# Supplementary material for: Direct C–OH/P(O)–H dehydration coupling forming phosphine oxides
Source: Royal Society of Chemistry journal article supplement (doi:10.1039/c8ob01299g), 2018-01-01

## *Supporting Information*

### **Direct C-OH/P(O)-H Dehydration Coupling Forming Phosphine**

#### **Oxides**

Long Chen,<sup>a</sup> Yueyue Zhu,<sup>a</sup> Tieqiao Chen,<sup>\*a,b</sup> Ji-Shu Zhang<sup>a</sup> and Li-Biao Han<sup>\*c</sup>

<sup>a</sup> *State Key Laboratory of Chemo/Biosensing and Chemometrics, College of Chemistry and Chemical Engineering, Hunan University, Changsha 410082, China*

<sup>b</sup> *Key Laboratory of Ministry of Education for Advanced Materials in Tropical Island Resources, College of Materials and Chemical Engineering, Hainan University, Haikou, 570228, China.*

<sup>c</sup> *National Institute of Advanced Industrial Science and Technology (AIST), Tsukuba, Ibaraki 305-8565, Japan*

*E-mail: chentieqiao@hnu.edu.cn; libiao-han@aist.go.jp*

#### **Table of Contents**

- 1) General information**
- 2) Procedures for the base-promoted dehydration coupling of P(O) – H compounds with phenylethanol**
- 3) Characterization and analytical data of products 3**
- 4) References**
- 5) Copies of <sup>1</sup>H NMR, <sup>13</sup>C NMR and <sup>31</sup>P NMR spectra**

## 1. General information

All reactions were carried out in dry Schlenk tubes under N<sub>2</sub> atmosphere. Dry solvents were obtained by purification according to standard methods. Reagents were used as received unless otherwise noted. Column chromatography was performed using Silica Gel 60 (particle size 37–54 μm). The pure products were obtained by means of column chromatography. <sup>1</sup>H NMR, <sup>13</sup>C NMR and <sup>31</sup>P NMR data were acquired on a Bruker-400 spectrometer (400 MHz for <sup>1</sup>H, 100 MHz for <sup>13</sup>C, and 162 MHz for <sup>31</sup>P NMR spectroscopy). Chemical shifts for <sup>1</sup>H NMR are referred to internal Me<sub>4</sub>Si (0 ppm) and reported as follows: chemical shift (δ ppm), multiplicity, coupling constant (Hz) and integration.

## 2. Procedures for the base-promoted dehydration coupling of P(O)-H compounds with phenylethanol

1) A Typical procedure.

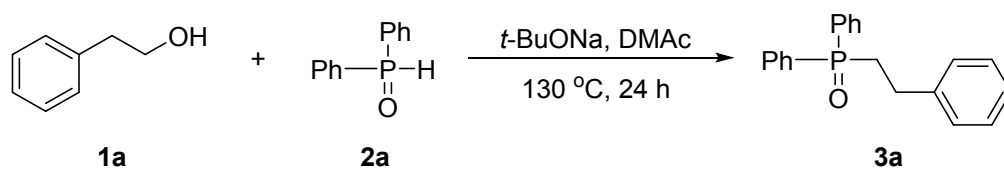

Under the Nitrogen atmosphere, 0.5 mmol phenylethanol **1a**, 0.2 mmol diphenylphosphine oxide **2a**, 0.2 mmol sodium *tert*-butoxide and 1 mL DMAc were charged into a 25 mL Schleck tube, and the mixture was heated at 130 °C for 24 h. After being cooled to room temperature, the mixture was added to 10 mL CH<sub>2</sub>Cl<sub>2</sub> and washed by 10 mL water for three times. After removal of the volatiles in vacuum, the residues were passed through a short silica chromatography (particle size 37–54 μm, ethyl acetate/petroleum ether as eluent) to afford analytically pure **3a** in 80% isolated yield.

2) 10 mmol scale experiment

Under the Nitrogen atmosphere, 25 mmol phenylethanol **1a** (3.0541 g), 10 mmol diphenylphosphine oxide **2a** (2.0220 g), 10 mmol sodium *tert*-butoxide and 40 mL DMAc were charged into a 100 mL Schleck tube, and the mixture was heated at 130 °C for 24 h. After being cooled to room temperature, the mixture was added to 200 mL CH<sub>2</sub>Cl<sub>2</sub> and washed by 100 mL water for three times. After removal of the volatiles in vacuum, the residues were passed through a silica chromatography (particle size 37–54 μm, ethyl acetate/petroleum ether as eluent) to afford analytically pure **3a** in 85% isolated yield (2.6041 g). When the experiment was conducted in the absence of solvent DMAc, **3a** was obtained in 76% isolated yield according to a similar procedure (2.3281 g).

### 3.Characterization and analytical data of products 3

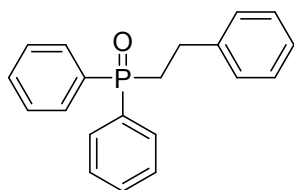

**3a**

**phenethyldiphenylphosphine oxide (3a).** Purification by column chromatography on silica gel and eluted with ethyl acetate/petroleum ether (1/2) afforded **3a** (49.0 mg, 80% yield) as a white solid;  $^1\text{H}$  NMR (400 MHz,  $\text{CDCl}_3$ ):  $\delta$  7.79–7.74 (m, 4H), 7.56–7.44 (m, 6H), 7.28–7.24 (m, 2H), 7.19–7.15 (m, 3H), 2.98–2.88 (m, 2H), 2.63–2.54 (m, 2H);  $^{13}\text{C}$  NMR (100 MHz,  $\text{CDCl}_3$ ):  $\delta$  141.2 (d,  $J_{\text{C-P}} = 15.3$  Hz), 132.7 (d,  $J_{\text{C-P}} = 97.8$  Hz), 131.9 (d,  $J_{\text{C-P}} = 2.6$  Hz), 130.8 (d,  $J_{\text{C-P}} = 9.2$  Hz), 128.8, 128.7 (d,  $J_{\text{C-P}} = 6.5$  Hz), 128.1, 126.4, 31.9 (d,  $J_{\text{C-P}} = 69.6$  Hz), 27.5 (d,  $J_{\text{C-P}} = 3.0$  Hz);  $^{31}\text{P}$  NMR (162 MHz,  $\text{CDCl}_3$ ):  $\delta$  31.69. This compound is known.<sup>1</sup>

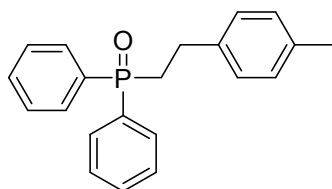

**3b**

**(4-methylphenethyl)diphenylphosphine oxide (3b).** Purification by column chromatography on silica gel and eluted with ethyl acetate/petroleum ether (1/2) afforded **3b** (46.8 mg, 73% yield) as a white solid;  $^1\text{H}$  NMR (400 MHz,  $\text{CDCl}_3$ ):  $\delta$  7.81–7.71 (m, 4H), 7.55–7.43 (m, 6H), 7.05 (m, 4H), 2.92–2.86 (m, 2H), 2.60–2.53 (m, 2H), 2.29 (s, 3H);  $^{13}\text{C}$  NMR (100 MHz,  $\text{CDCl}_3$ ):  $\delta$  138.1 (d,  $J_{\text{C-P}} = 15.3$  Hz), 135.9, 132.8 (d,  $J_{\text{C-P}} = 97.6$  Hz), 131.8 (d,  $J_{\text{C-P}} = 2.6$  Hz), 130.8 (d,  $J_{\text{C-P}} = 9.3$  Hz), 129.3, 128.7 (d,  $J_{\text{C-P}} = 11.5$  Hz), 128.0, 32.0 (d,  $J_{\text{C-P}} = 69.3$  Hz), 27.1 (d,  $J_{\text{C-P}} = 3.1$  Hz), 21.0;  $^{31}\text{P}$  NMR (162 MHz,  $\text{CDCl}_3$ ):  $\delta$  31.66. This compound is known.<sup>1</sup>

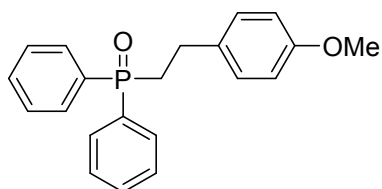

**3c**

**(4-methoxyphenethyl)diphenylphosphine oxide (3c).** Purification by column chromatography on silica gel and eluted with ethyl acetate/petroleum ether (1/2) afforded **3c** (47.1 mg, 70% yield) as a white solid;  $^1\text{H}$  NMR (400 MHz,  $\text{CDCl}_3$ ):  $\delta$  7.82–7.71 (m, 4H), 7.55–7.48 (m, 6H), 7.09–7.07 (m, 2H), 6.81–6.79 (m, 2H), 3.77 (s, 3H), 2.91–2.85 (m, 2H), 2.59–2.52 (m, 2H);  $^{13}\text{C}$  NMR (100 MHz,  $\text{CDCl}_3$ ):  $\delta$  158.1, 133.2 (d,  $J_{\text{C-P}} = 15.6$  Hz), 132.8 (d,  $J_{\text{C-P}} = 97.5$  Hz), 131.8 (d,  $J_{\text{C-P}} = 2.6$  Hz), 130.8 (d,  $J_{\text{C-P}} = 9.3$  Hz), 129.0, 128.7 (d,  $J_{\text{C-P}} = 11.5$  Hz), 114.0, 55.3, 32.1 (d,  $J_{\text{C-P}} = 69.2$  Hz), 26.7 (d,  $J_{\text{C-P}} = 3.1$  Hz);  $^{31}\text{P}$  NMR (162 MHz,  $\text{CDCl}_3$ ):  $\delta$  31.62. This compound is known.<sup>2</sup>

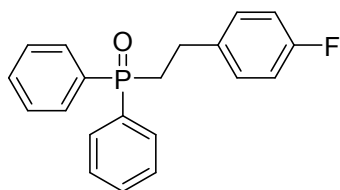

**3d**

**(4-fluorophenethyl)diphenylphosphine oxide(3d).** Purification by column chromatography on silica gel and eluted with ethyl acetate/petroleum ether (2/1) afforded **3d** (38.3 mg, 59% yield) as a white solid;  $^1\text{H NMR}$  (400 MHz,  $\text{CDCl}_3$ ):  $\delta$  7.72–7.64 (m, 4H), 7.48–7.36 (m, 6H), 7.06–7.00 (m, 2H), 6.84 (m, 2H), 2.83 (m, 2H), 2.47 (m, 2H);  $^{13}\text{C NMR}$  (100 MHz,  $\text{CDCl}_3$ ):  $\delta$  161.5 (d,  $J_{\text{F-C}} = 244.4$  Hz), 136.7 (dd,  $J_{\text{C-P}} = 15.0$  Hz,  $J_{\text{C-F}} = 3.1$  Hz), 132.7 (d,  $J_{\text{C-P}} = 98.3$  Hz), 131.9 (d,  $J_{\text{C-P}} = 2.6$  Hz), 130.8 (d,  $J_{\text{C-P}} = 9.3$  Hz), 129.5 (d,  $J_{\text{C-F}} = 7.9$  Hz), 128.8 (d,  $J_{\text{C-P}} = 11.6$  Hz), 115.4 (d,  $J_{\text{C-F}} = 21.3$  Hz), 32.0 (d,  $J_{\text{C-P}} = 69.8$  Hz), 26.8 (d,  $J_{\text{C-P}} = 2.9$  Hz);  $^{31}\text{P NMR}$  (162 MHz,  $\text{CDCl}_3$ ):  $\delta$  31.43. This compound is known.<sup>2</sup>

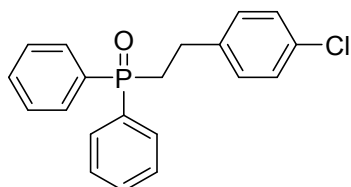

**3e**

**(4-chlorophenethyl)diphenylphosphine oxide (3e).** Purification by column chromatography on silica gel and eluted with ethyl acetate/petroleum ether (1/2) afforded **3e** (60.7 mg, 89% yield) as a white solid;  $^1\text{H NMR}$  (400 MHz,  $\text{CDCl}_3$ ):  $\delta$  7.80–7.70 (m, 4H), 7.53–7.48 (m, 6H), 7.21–7.20 (m, 2H), 7.09–7.07 (m, 2H), 2.94–2.88 (m, 2H), 2.58–2.52 (m, 2H);  $^{13}\text{C NMR}$  (100 MHz,  $\text{CDCl}_3$ ):  $\delta$  139.6 (d,  $J_{\text{C-P}} = 15.0$  Hz), 132.6 (d,  $J_{\text{C-P}} = 98.4$  Hz), 132.1, 131.9 (d,  $J_{\text{C-P}} = 2.6$  Hz), 130.8 (d,  $J_{\text{C-P}} = 9.3$  Hz), 129.5, 128.8 (d,  $J_{\text{C-P}} = 11.6$  Hz), 128.7, 31.8 (d,  $J_{\text{C-P}} = 69.5$  Hz), 27.0 (d,  $J_{\text{C-P}} = 2.9$  Hz);  $^{31}\text{P NMR}$  (162 MHz,  $\text{CDCl}_3$ ):  $\delta$  31.30. This compound is known.<sup>2</sup>

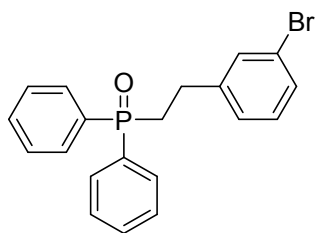

**3f**

**(3-bromophenethyl)diphenylphosphine oxide (3f).** Purification by column chromatography on silica gel and eluted with ethyl acetate/petroleum ether (1/2) afforded **3f** (67.8 mg, 88% yield) as a white solid;  $^1\text{H NMR}$  (400 MHz,  $\text{CDCl}_3$ ):  $\delta$  7.78–7.74 (m, 4H), 7.55–7.46 (m, 6H), 7.29–7.27 (m, 2H), 7.13–7.08 (m, 2H), 2.94–2.88 (m, 2H), 2.59–2.52 (m, 2H);  $^{13}\text{C NMR}$  (100 MHz,  $\text{CDCl}_3$ ):  $\delta$  143.4 (d,  $J_{\text{C-P}} = 14.9$  Hz), 132.5 (d,  $J_{\text{C-P}} = 98.1$  Hz), 131.9 (d,  $J_{\text{C-P}} = 2.7$  Hz), 131.1, 130.8 (d,  $J_{\text{C-P}} = 9.3$  Hz), 130.2, 129.5, 128.8 (d,  $J_{\text{C-P}} = 11.6$  Hz), 126.9, 122.6, 31.6 (d,  $J_{\text{C-P}} = 69.5$  Hz), 27.3 (d,  $J_{\text{C-P}} = 2.9$  Hz);  $^{31}\text{P NMR}$  (162 MHz,  $\text{CDCl}_3$ ):  $\delta$  31.20. This compound is known.

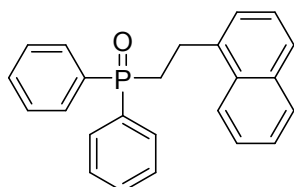

**3g**

**(2-(naphthalen-1-yl)ethyl)diphenylphosphine oxide(3g).** Purification by column chromatography on silica gel and eluted with ethyl acetate/petroleum ether (1/2) afforded **3g** (64.9 mg, 91% yield) as a pale yellow solid;  $^1\text{H NMR}$  (400 MHz,  $\text{CDCl}_3$ ):  $\delta$  7.89–7.80 (m, 6H), 7.73–7.71 (m, 1H), 7.58–7.48 (m, 8H), 7.39–7.32 (m, 2H), 3.45–3.39 (m, 2H), 2.75–2.68 (m, 2H);  $^{13}\text{C NMR}$  (100 MHz,  $\text{CDCl}_3$ ):  $\delta$  137.3 (d,  $J_{\text{C-P}} = 14.6$  Hz), 133.9, 132.8 (d,  $J_{\text{C-P}} = 97.7$  Hz), 131.9 (d,  $J_{\text{C-P}} = 2.7$  Hz), 131.3, 130.8 (d,  $J_{\text{C-P}} = 9.3$  Hz), 128.9, 128.7 (d,  $J_{\text{C-P}} = 11.5$  Hz), 127.2, 126.2,

125.8, 125.7, 125.6, 123.3, 31.2 (d,  $J_{C-P}$  = 69.1 Hz), 24.8 (d,  $J_{C-P}$  = 2.8 Hz);  $^{31}\text{P}$  NMR (162 MHz,  $\text{CDCl}_3$ ):  $\delta$  31.69. This compound is known.<sup>1</sup>

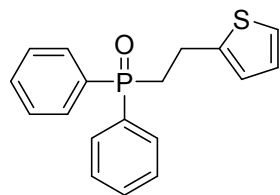

**3h**

**diphenyl(2-(thiophen-2-yl)ethyl)phosphine oxide(3h).** Purification by column chromatography on silica gel and eluted with ethyl acetate/petroleum ether (1/2) afforded **3h** (48.7 mg, 78% yield) as a white solid;  $^1\text{H}$  NMR (400 MHz,  $\text{CDCl}_3$ ):  $\delta$  7.79–7.74 (m, 4H), 7.54–7.49 (m, 6H), 7.11 (s, 1H), 6.88 (s, 1H), 6.79 (s, 1H), 3.18–3.13 (m, 2H), 2.89–2.63 (m, 2H);  $^{13}\text{C}$  NMR (100 MHz,  $\text{CDCl}_3$ ):  $\delta$  143.9 (d,  $J_{C-P}$  = 17.5 Hz), 132.5 (d,  $J$  = 99.3 Hz), 132.0 (d,  $J_{C-P}$  = 2.7 Hz), 130.8 (d,  $J_{C-P}$  = 9.3 Hz), 128.8 (d,  $J_{C-P}$  = 11.6 Hz), 126.9, 124.6, 123.6, 32.2 (d,  $J_{C-P}$  = 69.2 Hz), 22.2 (d,  $J_{C-P}$  = 2.1 Hz);  $^{31}\text{P}$  NMR (162 MHz,  $\text{CDCl}_3$ ):  $\delta$  31.07. This compound is known.<sup>1</sup>

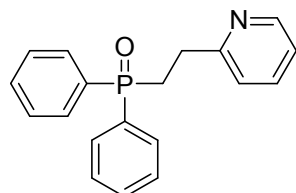

**3i**

**diphenyl(2-(pyridin-2-yl)ethyl)phosphine oxide(3i).** Purification by column chromatography on silica gel and eluted with ethyl acetate/petroleum ether (1/1) afforded **3i** (40.0 mg, 65% yield) as a white solid;  $^1\text{H}$  NMR (400 MHz,  $\text{CDCl}_3$ ):  $\delta$  8.49–8.48 (m, 1H), 7.81–7.78 (m, 4H), 7.55–7.44 (m, 7H), 7.14–7.12 (m, 1H), 7.10–7.07 (m, 1H), 3.15–3.09 (m, 2H), 2.82–2.78 (m, 2H);  $^{13}\text{C}$  NMR (100 MHz,  $\text{CDCl}_3$ ):  $\delta$  160.2 (d,  $J_{C-P}$  = 14.4 Hz), 149.3, 136.5, 132.8 (d,  $J_{C-P}$  = 98.2 Hz), 131.8 (d,  $J$  = 2.7 Hz), 130.8 (d,  $J_{C-P}$  = 9.4 Hz), 128.7 (d,  $J_{C-P}$  = 11.7 Hz), 123.11, 121.51, 29.7 (d,  $J_{C-P}$  = 2.7 Hz), 29.2 (d,  $J_{C-P}$  = 71.2 Hz);  $^{31}\text{P}$  NMR (162 MHz,  $\text{CDCl}_3$ ):  $\delta$  32.39. This compound is known.<sup>2</sup>

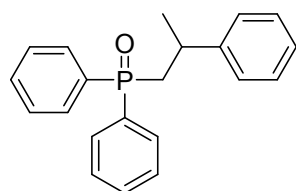

**3j**

**diphenyl(2-phenylpropyl)phosphine oxide (3j).** Purification by column chromatography on silica gel and eluted with ethyl acetate/petroleum ether (1/2) afforded **3j** (48.7 mg, 76% yield) as a white solid;  $^1\text{H}$  NMR (400 MHz,  $\text{CDCl}_3$ ):  $\delta$  7.77–7.72 (m, 2H), 7.68–7.63 (m, 2H), 7.49–7.35 (m, 6H), 7.21–7.17 (m, 2H), 7.13–7.09 (m, 3H), 3.38–3.27 (m, 1H), 2.63–2.54 (m, 2H), 1.38–1.37 (m, 3H);  $^{13}\text{C}$  NMR (100 MHz,  $\text{CDCl}_3$ )  $\delta$  147.0 (d,  $J_{C-P}$  = 10.2 Hz), 134.4 (d,  $J_{C-P}$  = 97.2 Hz), 132.8 (d,  $J_{C-P}$  = 97.6 Hz), 131.6 (d,  $J_{C-P}$  = 2.7 Hz), 131.5 (d,  $J_{C-P}$  = 2.7 Hz), 130.8 (d,  $J_{C-P}$  = 9.1 Hz), 130.5 (d,  $J_{C-P}$  = 9.2 Hz), 128.6 (d,  $J_{C-P}$  = 23.9 Hz), 128.55 (d,  $J_{C-P}$  = 1.6 Hz), 128.5, 126.6, 126.4, 38.4 (d,  $J_{C-P}$  = 69.0 Hz), 34.3 (d,  $J_{C-P}$  = 3.1 Hz), 23.5 (d,  $J_{C-P}$  = 5.2 Hz);  $^{31}\text{P}$  NMR (162 MHz,  $\text{CDCl}_3$ ):  $\delta$  30.30. This compound is known.<sup>2</sup>

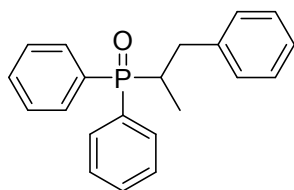

**3k**

**diphenyl(1-phenylpropan-2-yl)phosphine oxide (3k).** Purification by column chromatography on silica gel and eluted with ethyl acetate/petroleum ether (1/2) afforded **3k** (36.5 mg, 57% yield) as a white solid;  $^1\text{H}$  NMR (400 MHz,  $\text{CDCl}_3$ ):  $\delta$  7.91–7.81 (m, 4H), 7.55–7.45 (m, 6H), 7.28–7.24 (m, 2H), 7.20–7.17 (m, 1H), 7.12–7.10 (m, 2H), 3.09–3.02 (m, 1H), 2.87–2.59 (m, 2H), 1.09–1.04 (m, 3H);  $^{13}\text{C}$  NMR (100 MHz,  $\text{CDCl}_3$ ):  $\delta$  139.6 (d,  $J_{\text{C-P}} = 14.7$  Hz), 132.2 (d,  $J_{\text{C-P}} = 94.1$  Hz), 132.2 (d,  $J_{\text{C-P}} = 96.2$  Hz), 131.7 (d,  $J_{\text{C-P}} = 2.8$  Hz), 131.6 (d,  $J_{\text{C-P}} = 2.6$  Hz), 131.1, 131.0 (d,  $J_{\text{C-P}} = 8.6$  Hz), 129.0, 128.70, 128.7 (d,  $J_{\text{C-P}} = 23.5$  Hz), 128.5, 126.4, 35.0, 34.5 (d,  $J_{\text{C-P}} = 70.6$  Hz), 11.7 (d,  $J_{\text{C-P}} = 2.5$  Hz);  $^{31}\text{P}$  NMR (162 MHz,  $\text{CDCl}_3$ ):  $\delta$  36.16. This compound is known.<sup>4</sup>

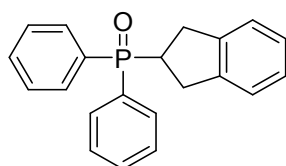

**3l**

**(2,3-dihydro-1H-inden-2-yl)diphenylphosphine oxide(3l).** Purification by column chromatography on silica gel and eluted with ethyl acetate/petroleum ether (1/1) afforded **3l** (45.2 mg, 71% yield) as a white solid;  $^1\text{H}$  NMR (400 MHz,  $\text{CDCl}_3$ ):  $\delta$  7.84–7.80 (m, 4H), 7.54–7.46 (m, 6H), 7.12 (s, 4H), 3.46–3.10 (m, 3H), 3.06–3.01 (m, 2H);  $^{13}\text{C}$  NMR (100 MHz,  $\text{CDCl}_3$ ):  $\delta$  141.7 (d,  $J_{\text{C-P}} = 9.9$  Hz), 132.8 (d,  $J_{\text{C-P}} = 96.8$  Hz), 131.8 (d,  $J_{\text{C-P}} = 2.6$  Hz), 131.0 (d,  $J_{\text{C-P}} = 8.9$  Hz), 128.7 (d,  $J_{\text{C-P}} = 11.3$  Hz), 126.7, 124.3, 37.8 (d,  $J_{\text{C-P}} = 75.7$  Hz), 33.1;  $^{31}\text{P}$  NMR (162 MHz,  $\text{CDCl}_3$ ):  $\delta$ : 33.38. Melting point: 170.8–176.3 °C. HRMS: Cal. for  $\text{C}_{21}\text{H}_{19}\text{OP}$  318.1174. Found 318.1182. IR: 3021, 1435, 1183, 1118, 746, 722, 695  $\text{cm}^{-1}$ .

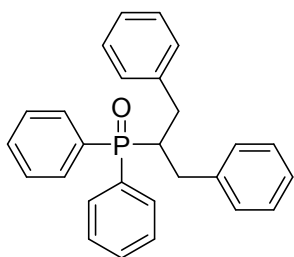

**3m**

**(1,3-diphenylpropan-2-yl)diphenylphosphine oxide(3m).** Purification by column chromatography on silica gel and eluted with ethyl acetate/petroleum ether (1/1) afforded **3m** (36.5 mg, 46% yield) as a white solid;  $^1\text{H}$  NMR (400 MHz,  $\text{CDCl}_3$ ):  $\delta$  7.79–7.74 (m, 4H), 7.43–7.34 (m, 6H), 7.05–7.04 (m, 6H), 6.81–6.79 (m, 4H), 3.10–3.02 (m, 2H), 2.93–2.79 (m, 3H);  $^{13}\text{C}$  NMR (100 MHz,  $\text{CDCl}_3$ ):  $\delta$  139.7 (d,  $J_{\text{C-P}} = 9.1$  Hz), 132.6 (d,  $J_{\text{C-P}} = 93.9$  Hz), 131.4 (d,  $J_{\text{C-P}} = 2.6$  Hz), 130.8 (d,  $J_{\text{C-P}} = 8.7$  Hz), 129.0, 128.5 (d,  $J_{\text{C-P}} = 11.3$  Hz), 128.2, 126.1, 42.2 (d,  $J_{\text{C-P}} = 68.9$  Hz), 33.8;  $^{31}\text{P}$  NMR (162 MHz,  $\text{CDCl}_3$ ):  $\delta$  34.59. This compound is known.<sup>7</sup>

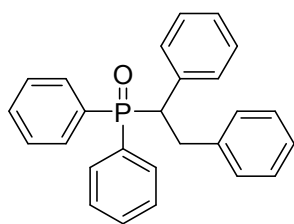

**3n**

**(1,2-diphenylethyl)diphenylphosphine oxide(3n).** Purification by column chromatography on silica gel and eluted with ethyl acetate/petroleum ether (1/1) afforded **3n** (24.7 mg, 32% yield) as a white solid;  $^1\text{H}$  NMR (400 MHz,  $\text{CDCl}_3$ ):  $\delta$  8.01–7.97 (m, 2H), 7.59 (s, 3H), 7.46–7.42 (m, 2H), 7.33–7.30 (m, 1H), 7.24–7.17 (m, 4H), 7.12–7.07 (m, 6H), 6.83–6.81 (m, 2H), 3.68–3.63 (m, 1H), 3.37–3.24 (m, 2H);  $^{13}\text{C}$  NMR (100 MHz,  $\text{CDCl}_3$ ):  $\delta$  139.4 (d,  $J_{\text{C-P}} = 14.1$  Hz), 135.4 (d,  $J_{\text{C-P}} = 5.3$  Hz), 132.1 (d,  $J_{\text{C-P}} = 98.7$  Hz), 132.0 (d,  $J_{\text{C-P}} = 94.1$  Hz), 131.6 (d,  $J_{\text{C-P}} = 59.1$  Hz), 131.7 (d,  $J_{\text{C-P}} = 59.1$  Hz), 131.2 (d,  $J_{\text{C-P}} = 39.7$  Hz), 131.1 (d,  $J_{\text{C-P}} = 40.1$  Hz), 130.0 (d,  $J_{\text{C-P}} = 5.9$  Hz), 128.9 (d,  $J_{\text{C-P}} = 11.2$  Hz), 128.4 (d,  $J_{\text{C-P}} = 53.9$  Hz), 128.2, 128.2, 128.0 (d,  $J_{\text{C-P}} = 11.6$  Hz), 127.0 (d,  $J_{\text{C-P}} = 2.4$  Hz), 126.2, 49.2 (d,  $J_{\text{C-P}} = 66.1$  Hz), 36.0;  $^{31}\text{P}$  NMR (162 MHz,  $\text{CDCl}_3$ ):  $\delta$  32.86. This compound is known.<sup>8</sup>

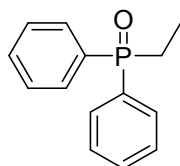

**3o**

**ethyldiphenylphosphine oxide(3o).** Purification by column chromatography on silica gel and eluted with ethyl acetate/petroleum ether (1/1) afforded **3o** (16.1 mg, 35% yield) as a white solid;  $^1\text{H}$  NMR (400 MHz,  $\text{CDCl}_3$ ):  $\delta$  7.76–7.72 (m, 4H), 7.54–7.45 (m, 6H), 2.33–2.24 (m, 2H), 1.26–1.24 (m, 1H), 1.20–1.16 (m, 2H);  $^{13}\text{C}$  NMR (100 MHz,  $\text{CDCl}_3$ ):  $\delta$  132.9 (d,  $J_{\text{C-P}} = 97.5$  Hz), 131.7 (d,  $J_{\text{C-P}} = 2.8$  Hz), 130.9 (d,  $J_{\text{C-P}} = 9.1$  Hz), 128.6 (d,  $J_{\text{C-P}} = 11.5$  Hz), 22.7 (d,  $J_{\text{C-P}} = 72.5$  Hz), 5.6 (d,  $J_{\text{C-P}} = 5.1$  Hz);  $^{31}\text{P}$  NMR (162 MHz,  $\text{CDCl}_3$ ):  $\delta$  34.06. This compound is known.<sup>3</sup>

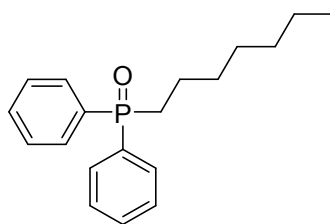

**3p**

**heptyldiphenylphosphine oxide(3p).** Purification by column chromatography on silica gel and eluted with ethyl acetate/petroleum ether (1/1) afforded **3p** (22.8 mg, 38% yield) as a white solid;  $^1\text{H}$  NMR (400 MHz,  $\text{CDCl}_3$ ):  $\delta$  7.68–7.63 (m, 4H), 7.45–7.36 (m, 6H), 2.21–2.14 (m, 2H), 1.59–1.49 (m, 2H), 1.32–1.27 (m, 2H), 1.18–1.15 (m, 6H), 0.78–0.75 (m, 3H);  $^{13}\text{C}$  NMR (100 MHz,  $\text{CDCl}_3$ ):  $\delta$  133.2 (d,  $J_{\text{C-P}} = 97.2$  Hz), 131.6 (d,  $J_{\text{C-P}} = 2.6$  Hz), 130.8 (d,  $J_{\text{C-P}} = 9.2$  Hz), 128.6 (d,  $J_{\text{C-P}} = 9.4$  Hz), 31.6, 31.0 (d,  $J_{\text{C-P}} = 14.6$  Hz), 29.7 (d,  $J_{\text{C-P}} = 76.9$  Hz), 28.7, 22.6, 21.4 (d,  $J_{\text{C-P}} = 3.8$  Hz), 14.0;  $^{31}\text{P}$  NMR (162 MHz,  $\text{CDCl}_3$ ):  $\delta$  32.66. This compound is known.<sup>5</sup>

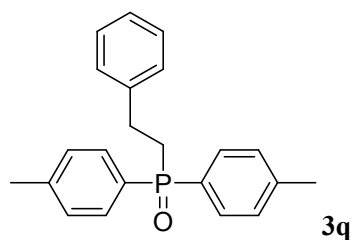

**phenethyldi-p-tolylphosphine oxide(3q).** Purification by column chromatography on silica gel and eluted with ethyl acetate/petroleum ether (1/2) afforded **3q** (50.8 mg, 76% yield) as a whitesolid;  $^1\text{H}$  NMR (400 MHz,  $\text{CDCl}_3$ ):  $\delta$  7.59–7.54 (m, 4H), 7.21–7.17 (m, 6H), 7.12–7.08 (m, 3H), 2.86–2.80 (m, 2H), 2.50–2.43 (m, 2H), 2.32 (s, 6H);  $^{13}\text{C}$  NMR (100 MHz,  $\text{CDCl}_3$ ):  $\delta$  142.2 (d,  $J_{\text{C-P}} = 2.6$  Hz), 141.4 (d,  $J_{\text{C-P}} = 15.2$  Hz), 130.8 (d,  $J_{\text{C-P}} = 9.6$  Hz), 129.6 (d,  $J_{\text{C-P}} = 100.2$  Hz), 129.5 (d,  $J_{\text{C-P}} = 12.0$  Hz), 128.6, 128.1, 126.3, 32.1 (d,  $J_{\text{C-P}} = 70.1$  Hz), 27.6 (d,  $J_{\text{C-P}} = 2.9$  Hz), 21.6.;  $^{31}\text{P}$  NMR (162 MHz,  $\text{CDCl}_3$ ):  $\delta$  32.01. This compound is known.<sup>1</sup>

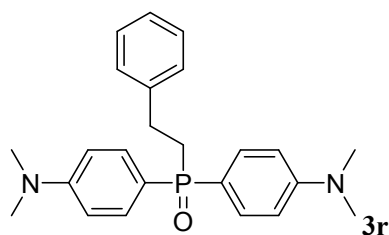

**bis(4-(dimethylamino)phenyl)(phenethyl)phosphine oxide(3r).** Purification by column chromatography on silica gel and eluted with ethyl acetate/petroleum ether (1/1) afforded **3r** (65.9 mg, 84% yield) as a white solid;  $^1\text{H}$  NMR (400 MHz,  $\text{CDCl}_3$ ):  $\delta$  7.59–7.54 (m, 4H), 7.27–7.24 (m, 2H), 7.18–7.15 (m, 3H), 6.73–6.70 (m, 4H), 3.00 (s, 12H), 2.93–2.87 (m, 2H), 2.50–2.43 (m, 2H);  $^{13}\text{C}$  NMR (100 MHz,  $\text{CDCl}_3$ ):  $\delta$  152.2 (d,  $J_{\text{C-P}} = 2.3$  Hz), 142.1 (d,  $J_{\text{C-P}} = 15.5$  Hz), 132.2 (d,  $J_{\text{C-P}} = 10.4$  Hz), 128.3 (d,  $J_{\text{C-P}} = 39.0$  Hz), 126.0, 118.9, 117.8, 111.5 (d,  $J_{\text{C-P}} = 12.3$  Hz), 40.0, 32.6 (d,  $J_{\text{C-P}} = 70.8$  Hz), 29.0 (d,  $J_{\text{C-P}} = 2.7$  Hz);  $^{31}\text{P}$  NMR (162 MHz,  $\text{CDCl}_3$ ):  $\delta$  32.84. Melting point: 177.5–179.1 °C. HRMS: Cal. for  $\text{C}_{24}\text{H}_{29}\text{N}_2\text{OP}$  392.2018. Found 392.2025. IR: 2943, 2861, 1452, 1400, 1165, 1118, 817, 740  $\text{cm}^{-1}$ .

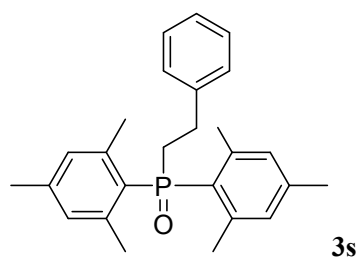

**dimesityl(phenethyl)phosphine oxide(3s).** Purification by column chromatography on silica gel and eluted with ethyl acetate/petroleum ether (1/2) afforded **3s** (55.5 mg, 71% yield) as a white solid;  $^1\text{H}$  NMR (400 MHz,  $\text{CDCl}_3$ ):  $\delta$  7.19–7.16 (m, 2H), 7.11–7.04 (m, 3H), 6.75 (s, 4H), 2.79–2.73 (m, 2H), 2.64–2.58 (m, 2H), 2.30 (s, 12H), 2.19 (s, 6H);  $^{13}\text{C}$  NMR (100 MHz,  $\text{CDCl}_3$ ):  $\delta$  142.0 (d,  $J_{\text{C-P}} = 16.8$  Hz), 141.2 (d,  $J_{\text{C-P}} = 10.0$  Hz), 140.7 (d,  $J_{\text{C-P}} = 2.6$  Hz), 131.1 (d,  $J_{\text{C-P}} = 11.0$  Hz), 130.0 (d,  $J_{\text{C-P}} = 94.1$  Hz), 128.4 (d,  $J_{\text{C-P}} = 28.2$  Hz), 126.1, 38.2 (d,  $J_{\text{C-P}} = 64.7$  Hz), 28.8 (d,  $J_{\text{C-P}} = 2.5$  Hz), 22.9 (d,  $J_{\text{C-P}} = 4.1$  Hz), 20.9;  $^{31}\text{P}$  NMR (162 MHz,  $\text{CDCl}_3$ ):  $\delta$  40.39. Melting point: 219.8–223.5 °C. HRMS: Cal. for  $\text{C}_{26}\text{H}_{31}\text{OP}$  390.2113. Found 390.2116. IR: 2918, 1400, 1200, 1169, 764, 735, 699, 646  $\text{cm}^{-1}$ .



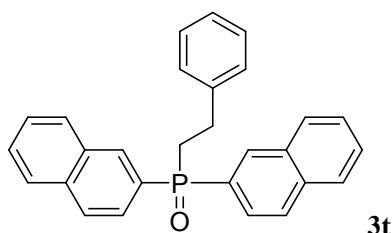

**di(naphthalen-2-yl)(phenethyl)phosphine oxide(3t).** Purification by column chromatography on silica gel and eluted with ethyl acetate/petroleum ether (1/2) afforded **3t** (56.1 mg, 69% yield) as a white solid;  $^1\text{H}$  NMR (400 MHz,  $\text{CDCl}_3$ ):  $\delta$  8.37–8.34 (m, 2H), 7.81–7.79 (m, 4H), 7.74–7.72 (m, 2H), 7.64–7.59 (m, 2H), 7.47–7.40 (m, 4H), 7.15–7.11 (m, 2H), 7.08–7.02 (m, 3H), 2.93–2.87 (m, 2H), 2.70–2.63 (m, 2H);  $^{13}\text{C}$  NMR (100 MHz,  $\text{CDCl}_3$ ):  $\delta$  141.2 (d,  $J_{\text{C-P}} = 15.2$  Hz), 134.7 (d,  $J_{\text{C-P}} = 2.3$  Hz), 132.9 (d,  $J_{\text{C-P}} = 8.5$  Hz), 132.7 (d,  $J_{\text{C-P}} = 12.5$  Hz), 129.9 (d,  $J_{\text{C-P}} = 98.2$  Hz), 128.9, 128.8, 128.7, 128.3, 128.2, 127.9, 127.1, 126.4, 125.6 (d,  $J_{\text{C-P}} = 10.5$  Hz), 31.8 (d,  $J_{\text{C-P}} = 69.5$  Hz), 27.7 (d,  $J_{\text{C-P}} = 3.0$  Hz);  $^{31}\text{P}$  NMR (162 MHz,  $\text{CDCl}_3$ ):  $\delta$  31.99. Melting point: 233.4–236.1 °C. HRMS: Cal. for  $\text{C}_{28}\text{H}_{23}\text{OP}$  406.1487. Found 406.1482. IR: 3094, 1452, 1440, 1167, 1094, 700, 653  $\text{cm}^{-1}$ .

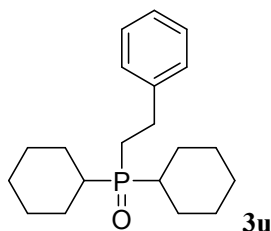

**dicyclohexyl(phenethyl)phosphine oxide(3u).** Purification by column chromatography on silica gel and eluted with ethyl acetate/petroleum ether (2/1) afforded **3u** (38.2 mg, 60% yield) as a white solid;  $^1\text{H}$  NMR (400 MHz,  $\text{CDCl}_3$ ):  $\delta$  7.32–7.28 (m, 2H), 7.23–7.19 (m, 3H), 2.97–2.91 (m, 2H), 1.98–1.93 (m, 5H), 1.85–1.75 (m, 9H), 1.42–1.39 (m, 4H), 1.28–1.24 (m, 6H);  $^{13}\text{C}$  NMR (100 MHz,  $\text{CDCl}_3$ ):  $\delta$  141.8 (d,  $J_{\text{C-P}} = 12.5$  Hz), 128.6, 128.0, 126.3, 36.4 (d,  $J_{\text{C-P}} = 63.8$  Hz), 28.1 (d,  $J_{\text{C-P}} = 3.6$  Hz), 26.6 (dd,  $J_{\text{C-P}} = 12.1, 2.9$  Hz), 26.0, 25.7 (d,  $J_{\text{C-P}} = 3.1$  Hz), 25.6 (d,  $J_{\text{C-P}} = 58.4$  Hz);  $^{31}\text{P}$  NMR (162 MHz,  $\text{CDCl}_3$ ):  $\delta$  50.24. This compound is known.<sup>6</sup>

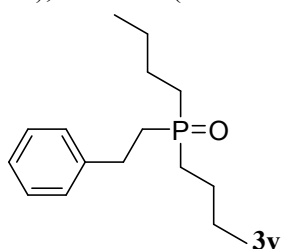

**dibutyl(phenethyl)phosphine oxide(3v).** Purification by column chromatography on silica gel and eluted with ethyl acetate/petroleum ether (2/1) afforded **3v** (34.6 mg, 65% yield) as a colorless oil;  $^1\text{H}$  NMR (400 MHz,  $\text{CDCl}_3$ ):  $\delta$  7.32–7.28 (m, 2H), 7.24–7.20 (m, 3H), 2.96–2.90 (m, 2H), 2.05–1.99 (m, 2H), 1.75–1.68 (m, 4H), 1.60–1.50 (m, 4H), 1.46–1.37 (m, 4H), 0.946–0.910 (m, 6H);  $^{13}\text{C}$  NMR (100 MHz,  $\text{CDCl}_3$ ):  $\delta$  141.2 (d,  $J_{\text{C-P}} = 13.2$  Hz), 128.7, 128.1, 126.4, 29.7 (d,  $J_{\text{C-P}} = 62.6$  Hz), 27.8 (d,  $J_{\text{C-P}} = 64.5$  Hz), 27.7 (d,  $J_{\text{C-P}} = 3.1$  Hz), 24.3 (d,  $J_{\text{C-P}} = 14.3$  Hz), 23.8 (d,  $J_{\text{C-P}} = 3.7$  Hz), 13.6;  $^{31}\text{P}$  NMR (162 MHz,  $\text{CDCl}_3$ ):  $\delta$  48.17. This compound is known.<sup>1</sup>

#### 4. References:

1. J.-S. Zhang, J.-Q. Zhang, T. Chen and L.-B. Han, *Org. Biomol. Chem.*, 2017, **15**, 5462-5467.
2. N. A. Isley, R. T. H. Linstadt, E. D. Slack, B. H. Lipshutz, *Dalton Trans.*, 2014, **43**, 13196.
3. G. Hu, W. Chen, T. Fu, Z. Peng, H. Qiao, Y. Gao, Y. Zhao, *Org. Lett.*, 2013, **15**, 5362-5365.
4. K. Takaki, G. Koshiji, K. Komeyama, M. Takeda, T. Shishido, A. Kitani, K. Takehira, *J. Org. Chem.*, 2003, **68**, 6554-6565.
5. S. H. Bertz, G. Dabbagh, *J. Am. Chem. Soc.*, 1981, **103**, 5932-5934.
6. T. Bunlaksananusorn, P. Knochel, *Tetrahedron Lett.*, 2002, **43**, 5817-5819.
7. S. G. Mahamulkar, I. Císařová, U. Jahn, *Adv. Synth. Catal.*, 2015, **357**, 793-700.
8. D. W. Allen, J. C. Tebby, *Tetrahedron*, 1967, **23**, 2795-2801.

## 5. Copies of $^1\text{H}$ NMR, $^{31}\text{P}$ NMR and $^{13}\text{C}$ NMR spectroscopies

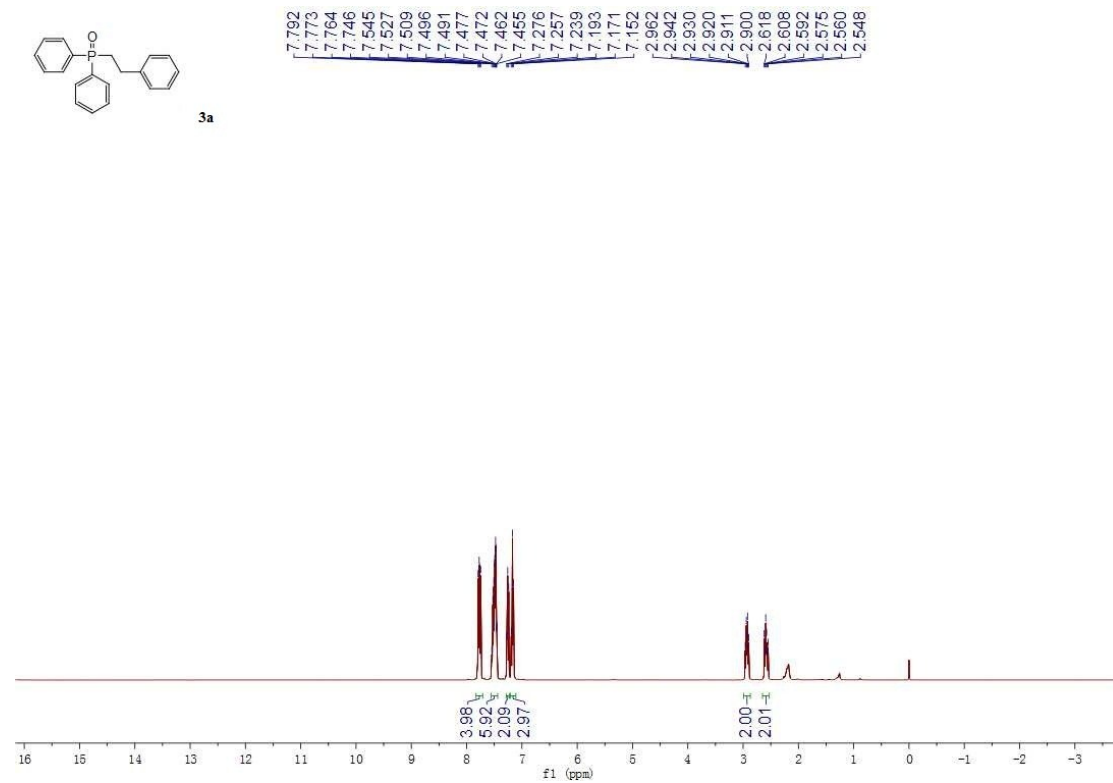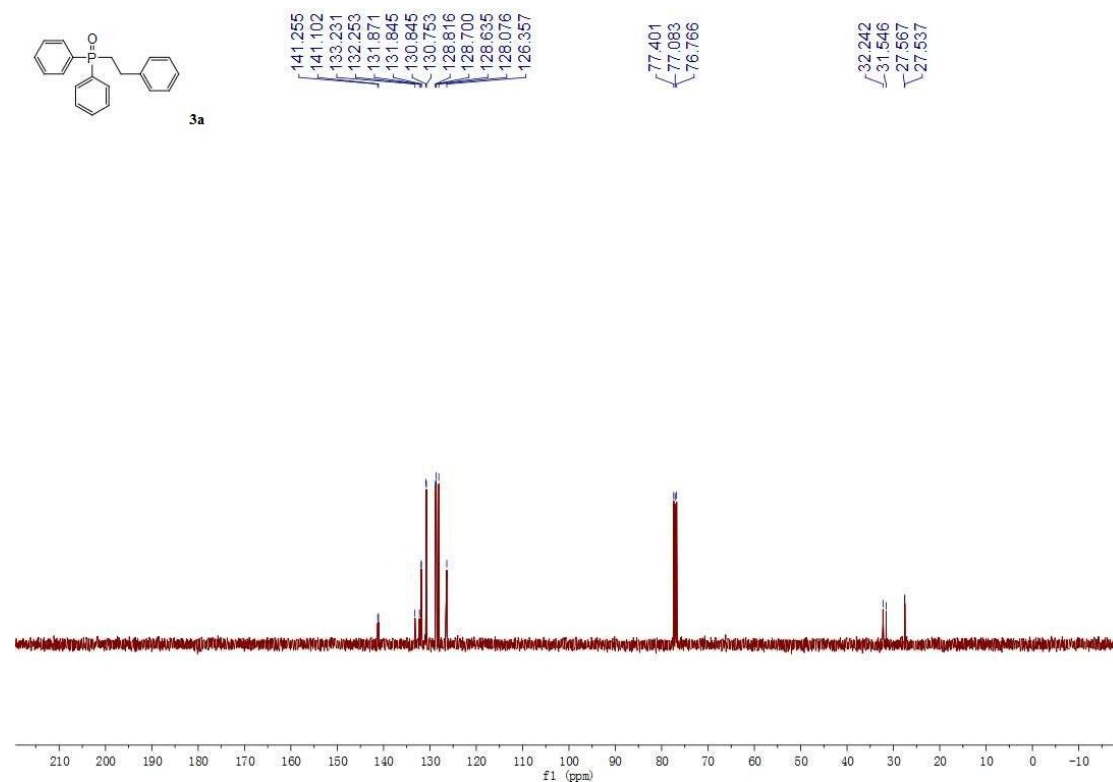

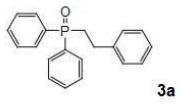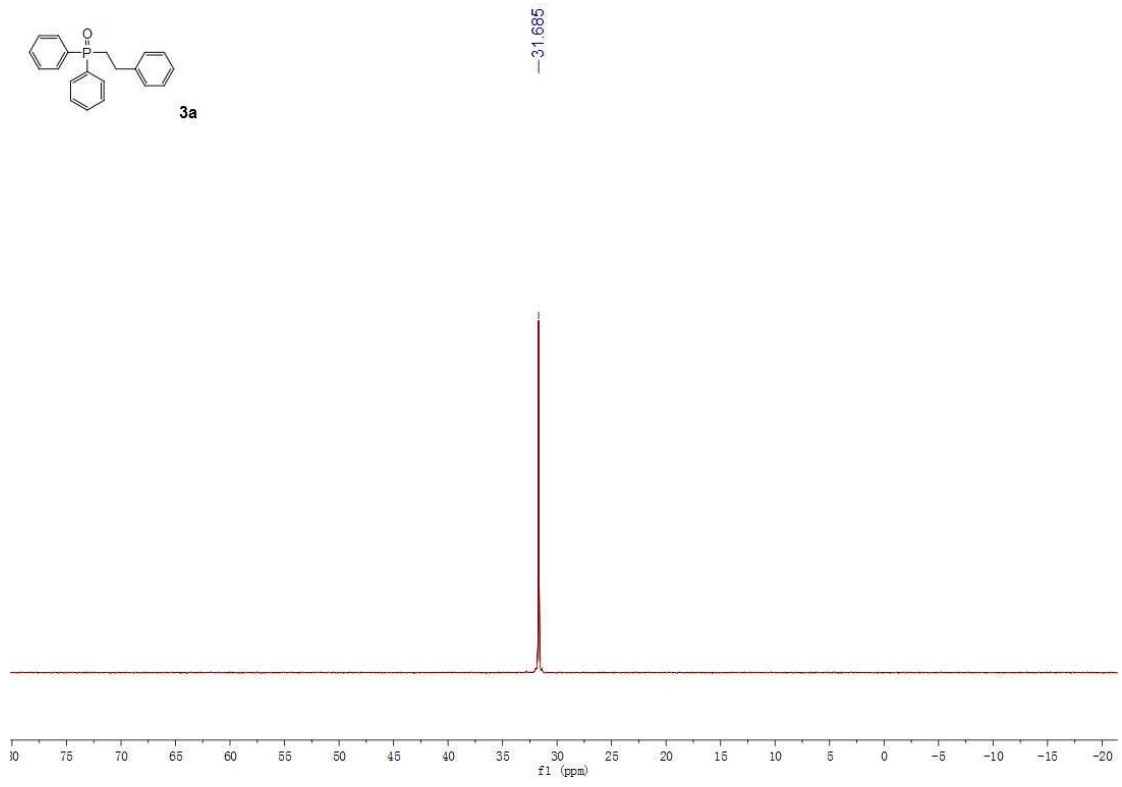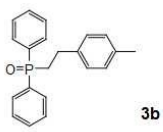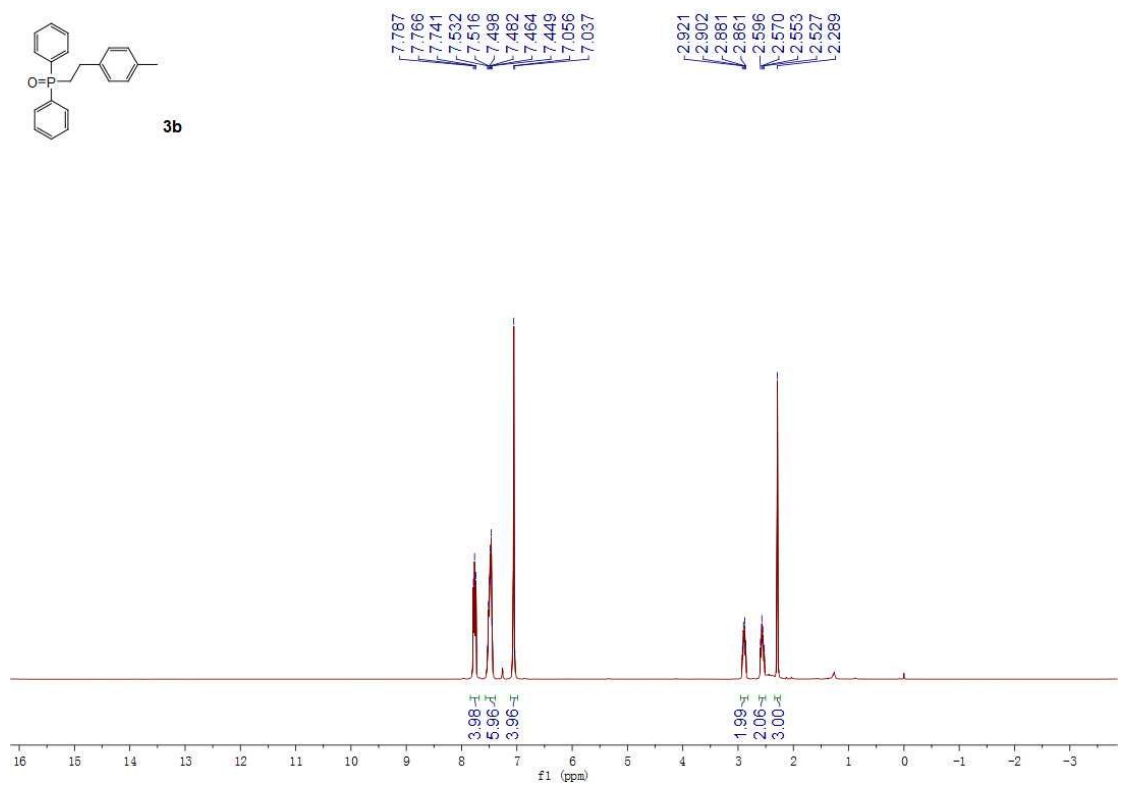

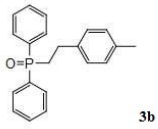

136.191  
136.038  
135.877  
133.320  
132.344  
131.826  
131.800  
130.844  
130.751  
129.298  
128.796  
128.681  
127.945

77.445  
77.127  
76.810

32.365  
31.672  
27.127  
27.096  
21.005

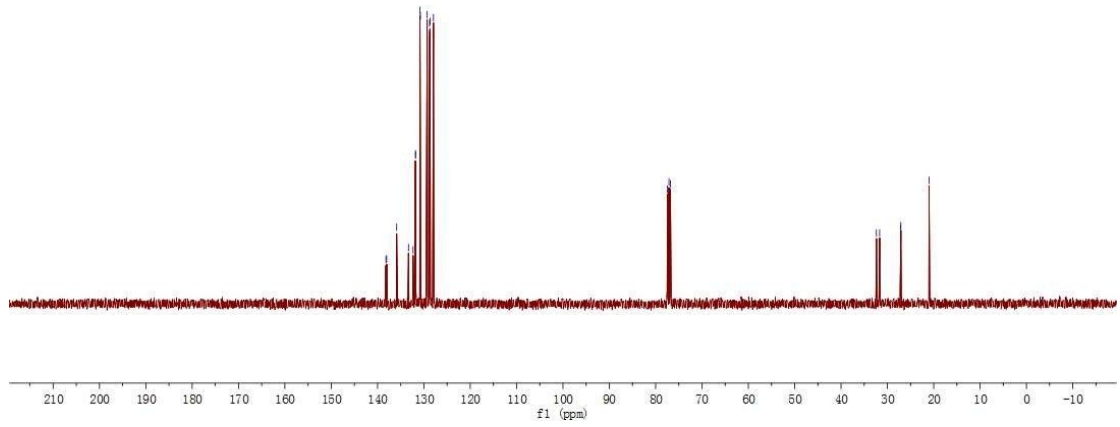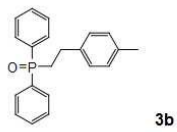

-31.659

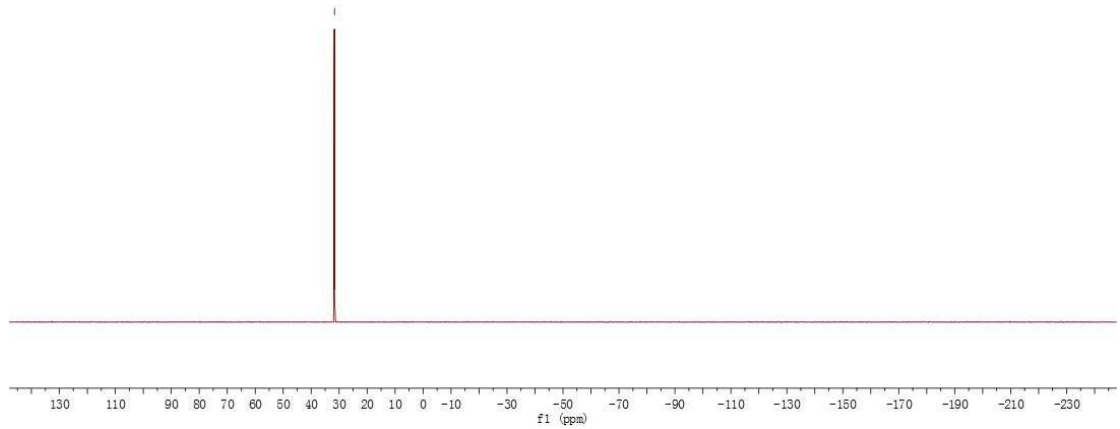

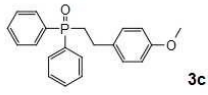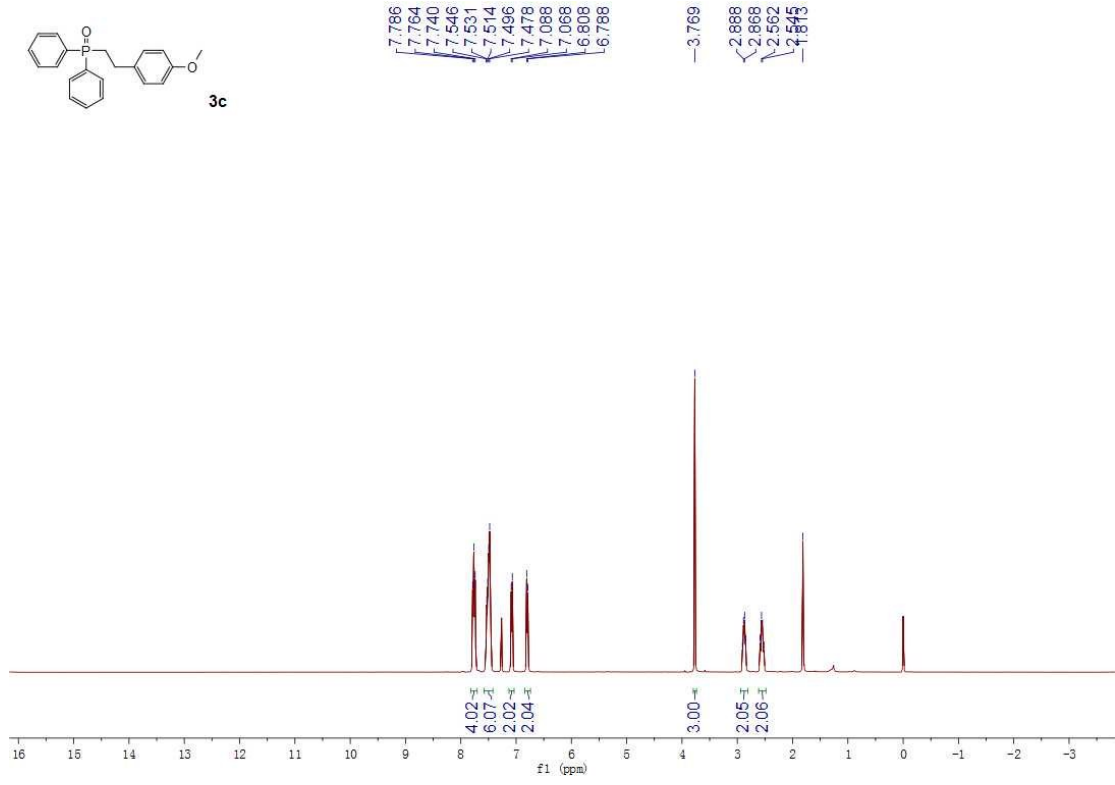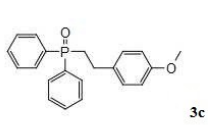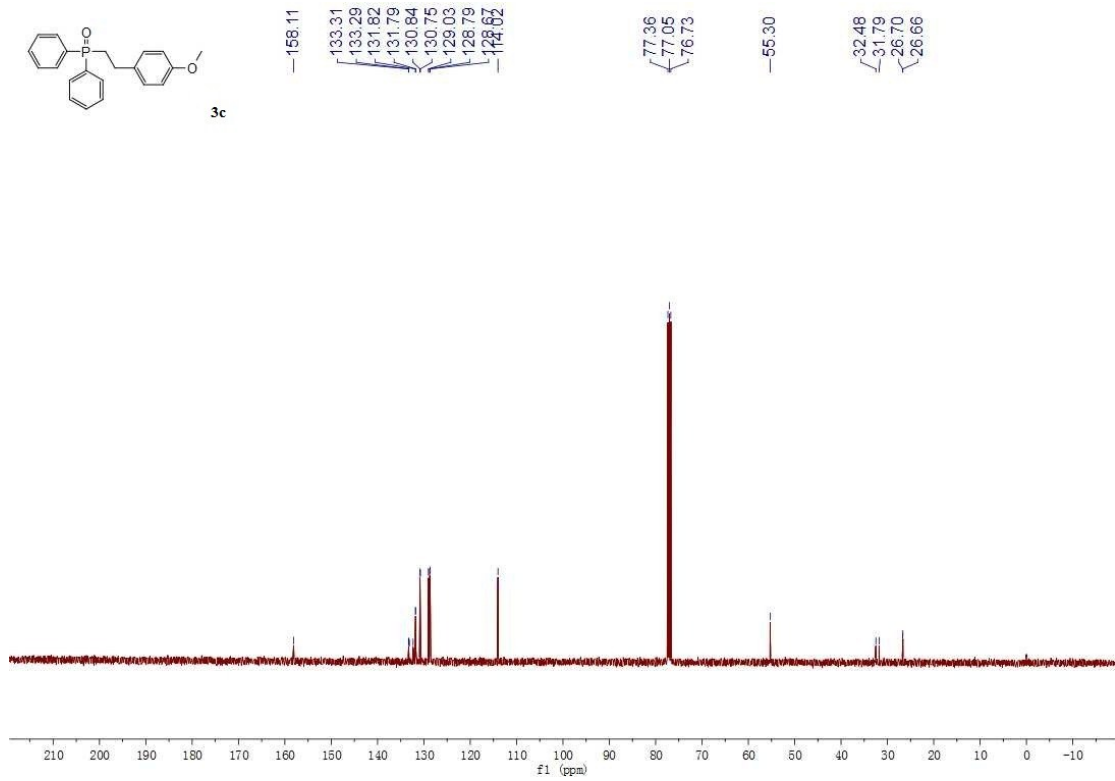

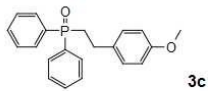

-31.621

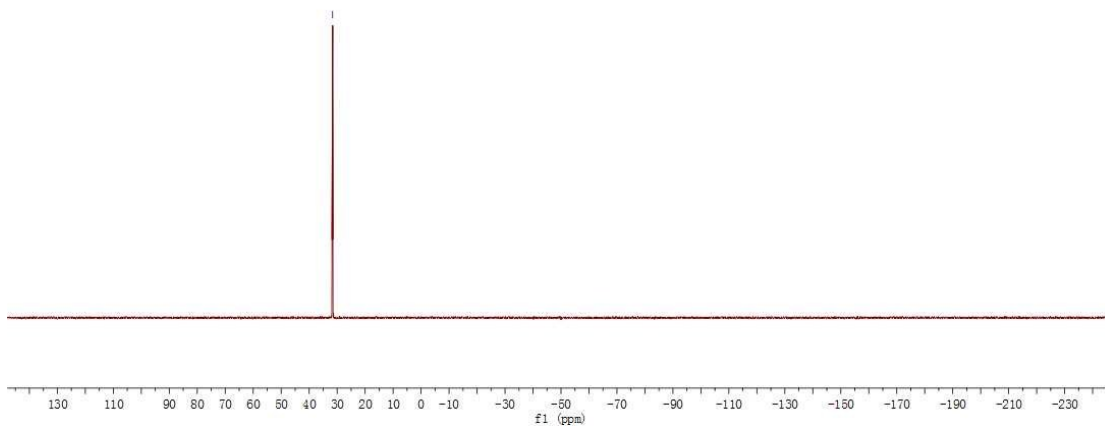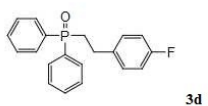

7.703  
7.683  
7.656  
7.469  
7.451  
7.434  
7.415  
7.396  
7.379  
7.045  
7.029  
7.013  
6.865  
6.845  
6.825  
2.863  
2.843  
2.822  
2.802  
2.509  
2.483  
2.467  
2.440

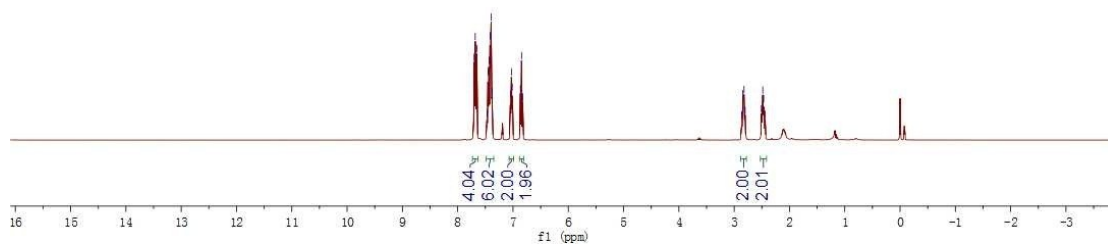

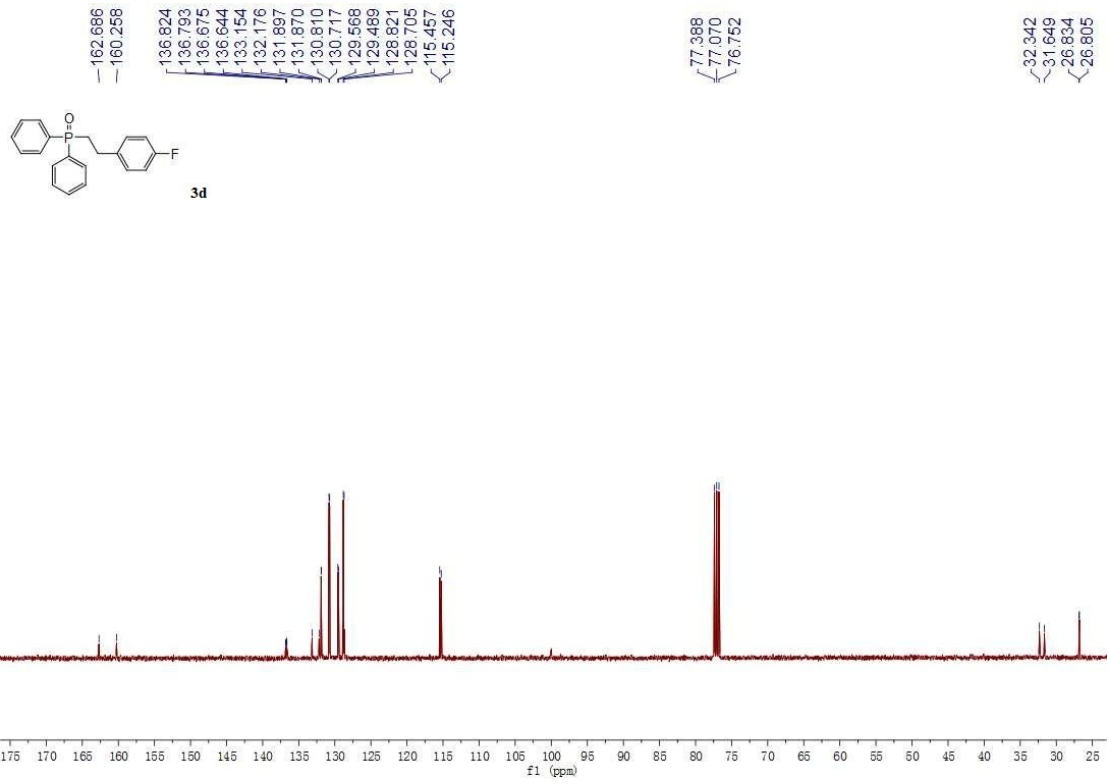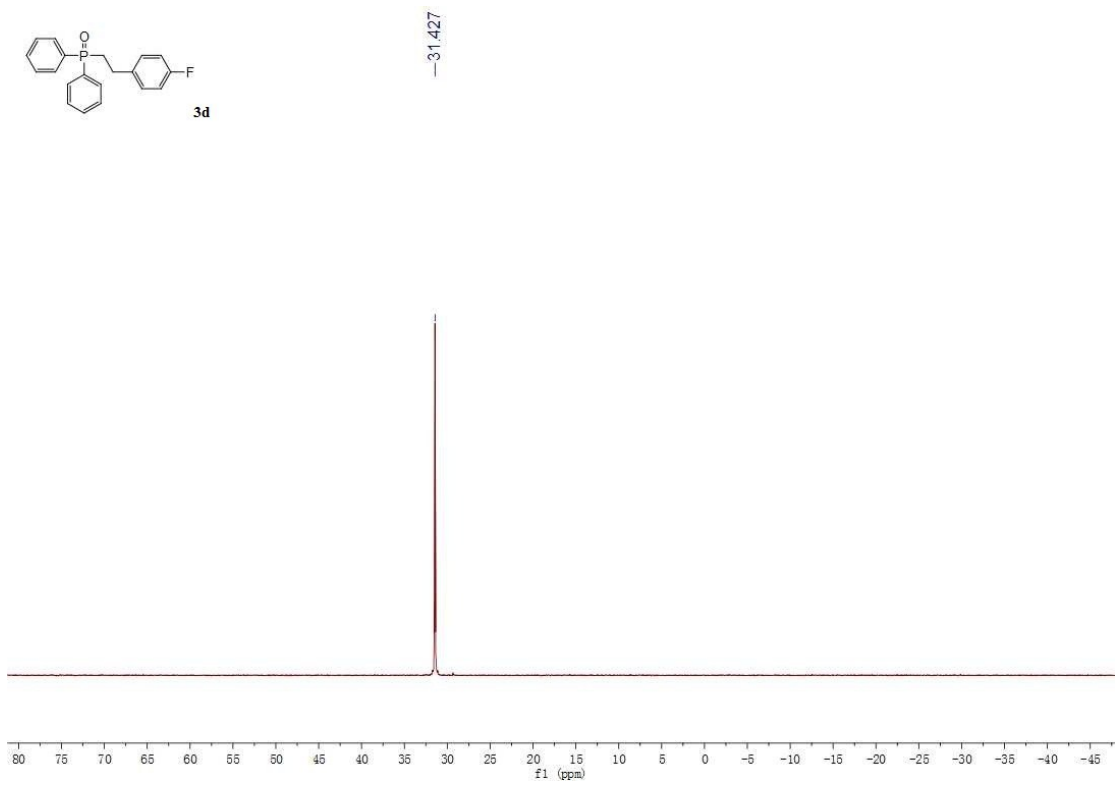



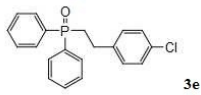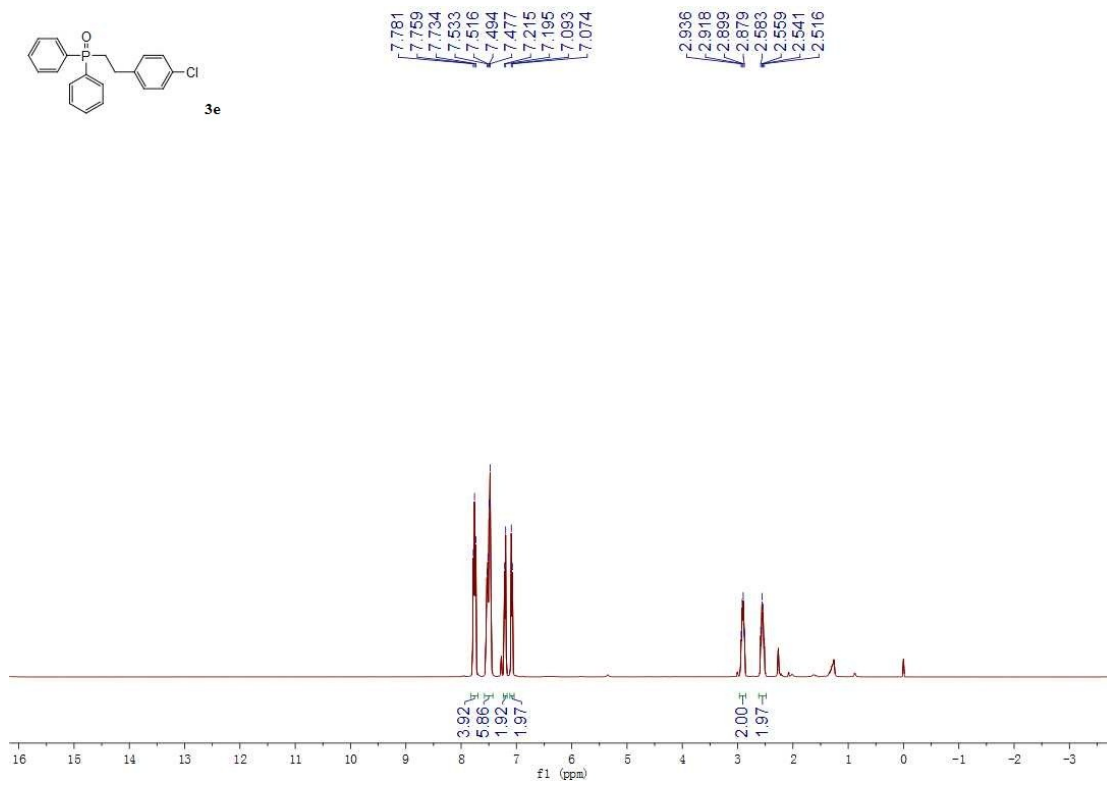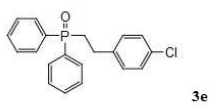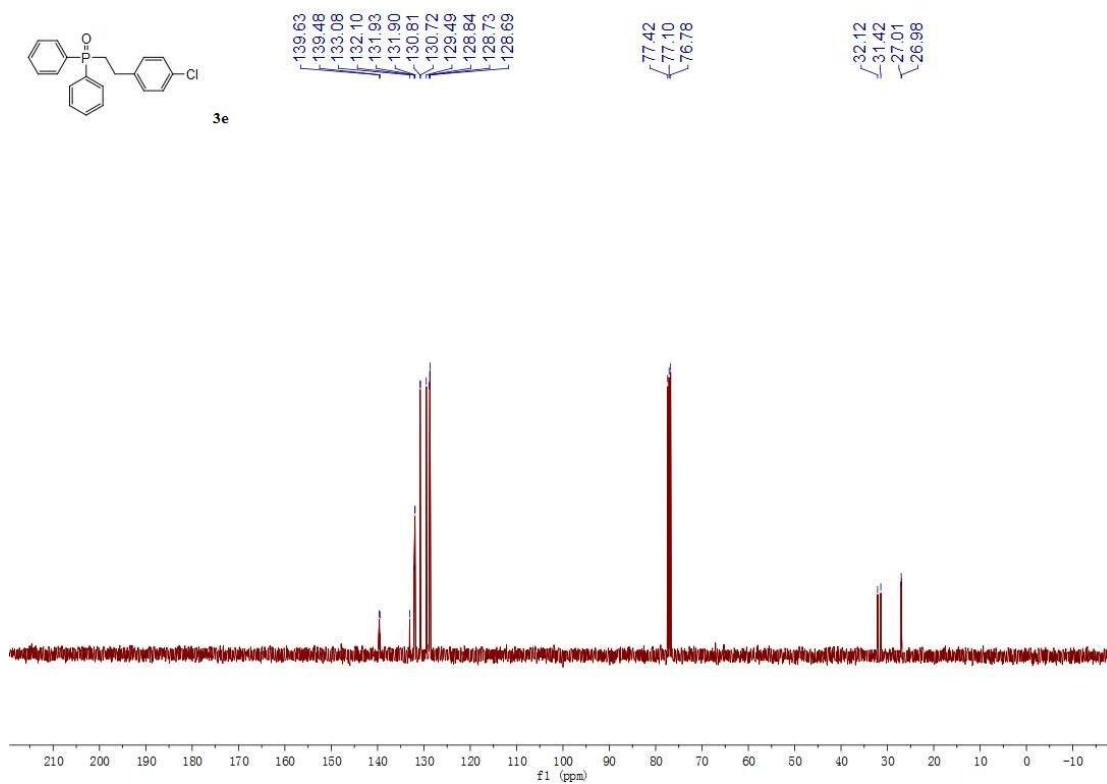

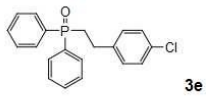

—31.295

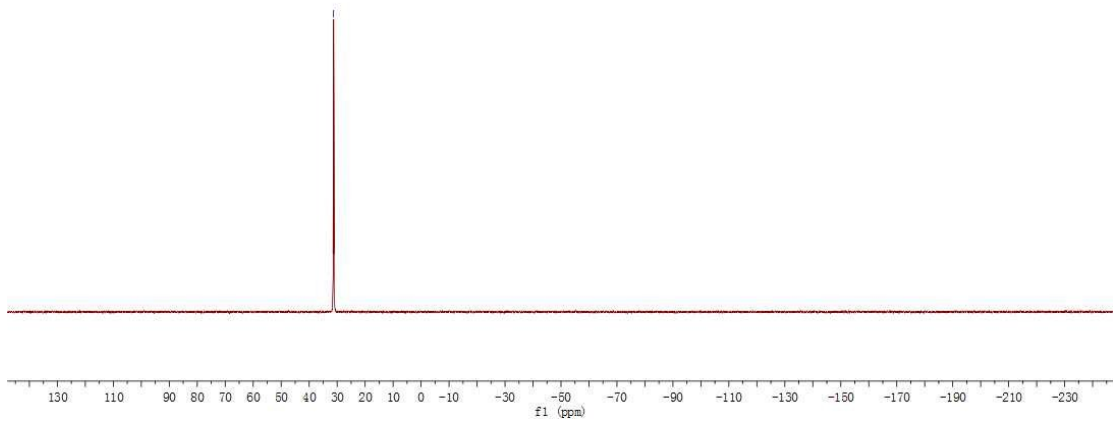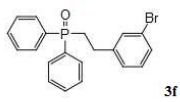

7.784  
 7.765  
 7.756  
 7.737  
 7.551  
 7.533  
 7.516  
 7.499  
 7.480  
 7.463  
 7.291  
 7.274  
 7.132  
 7.113  
 7.095  
 7.081  
 -2.939  
 -2.919  
 -2.907  
 -2.898  
 -2.877  
 -2.592  
 -2.580  
 -2.565  
 -2.550  
 -2.522

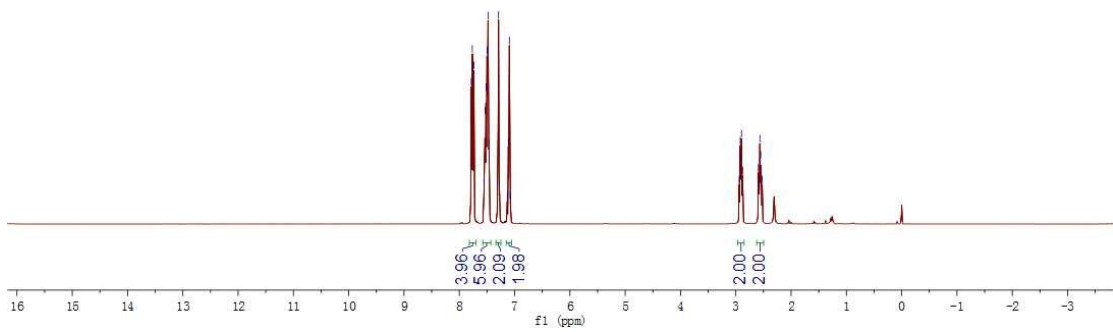

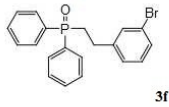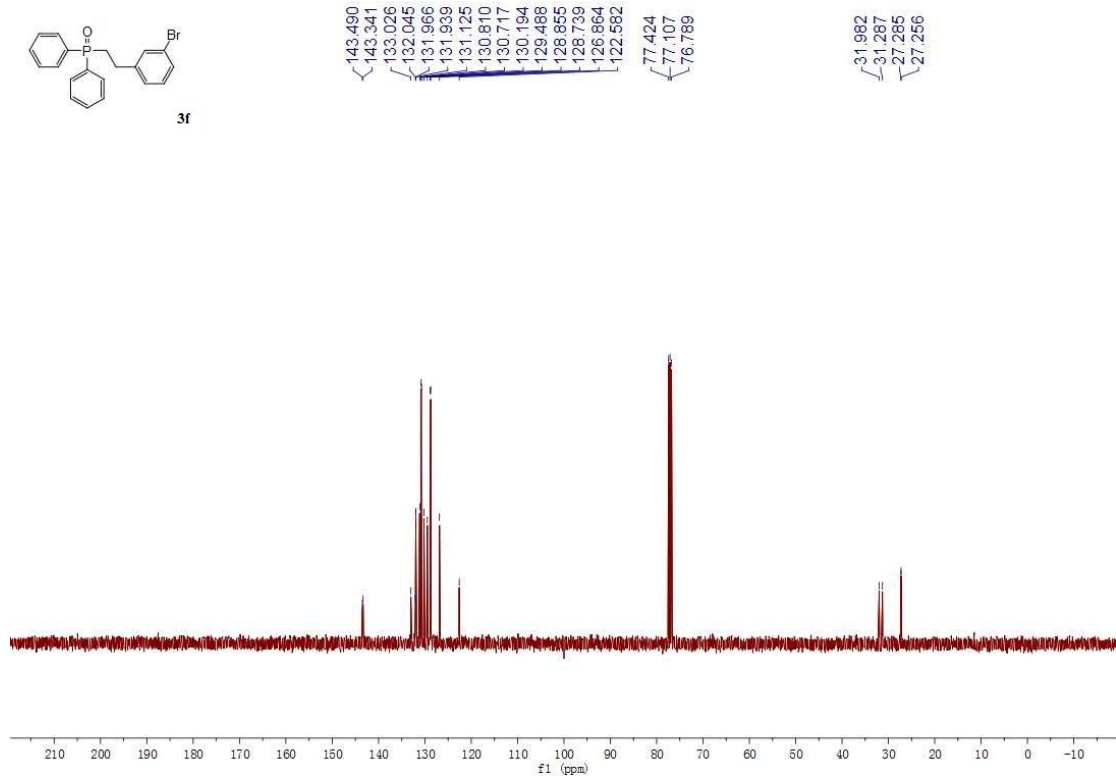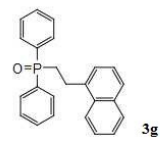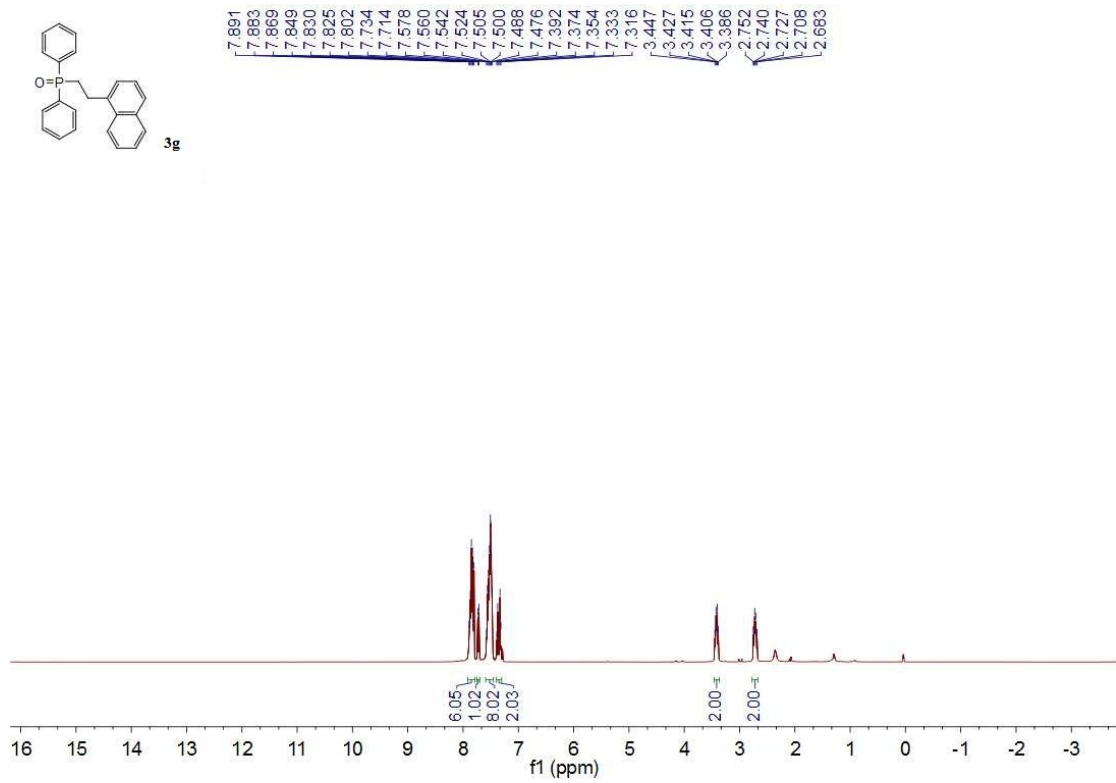

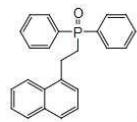

3g

137.344  
137.198  
133.929  
133.287  
132.310  
131.895  
131.868  
131.306  
130.866  
130.773  
128.903  
128.802  
128.687  
127.235  
126.187  
125.671  
125.599  
123.306

77.414  
77.096  
76.778

31.554  
30.863  
24.812  
24.784

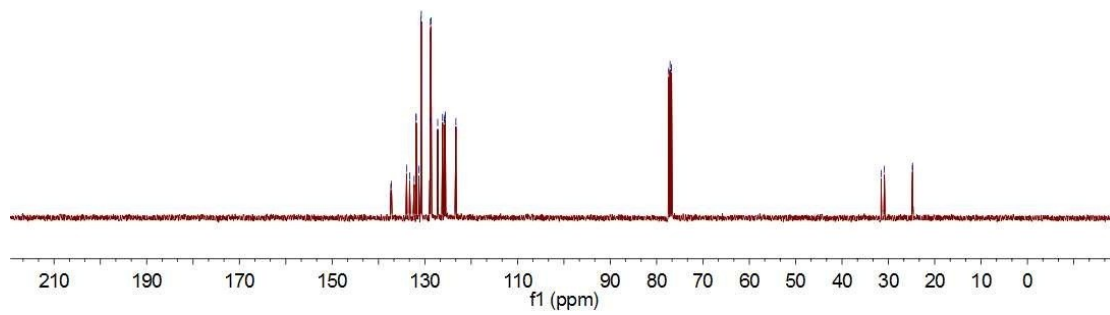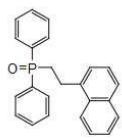

3g

-31.695

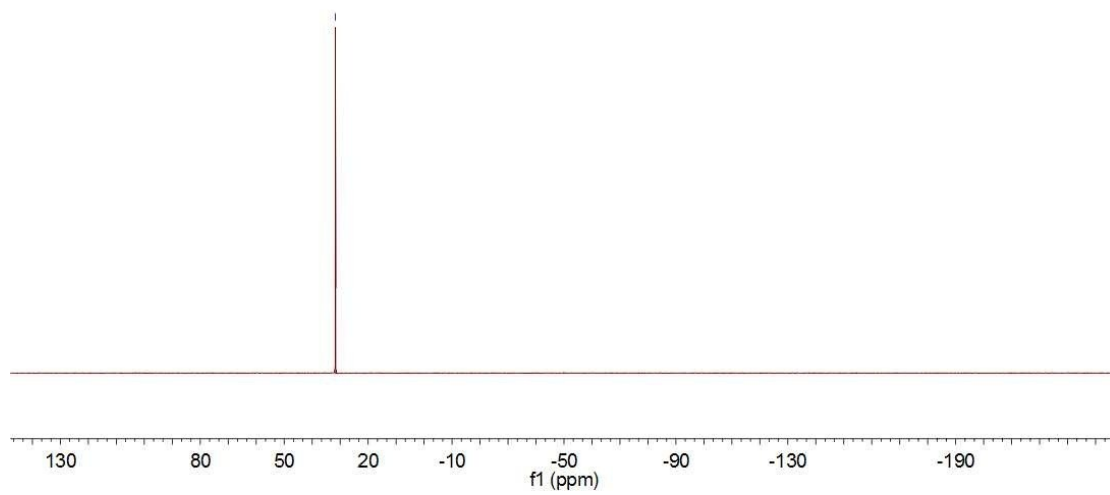

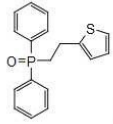

3h

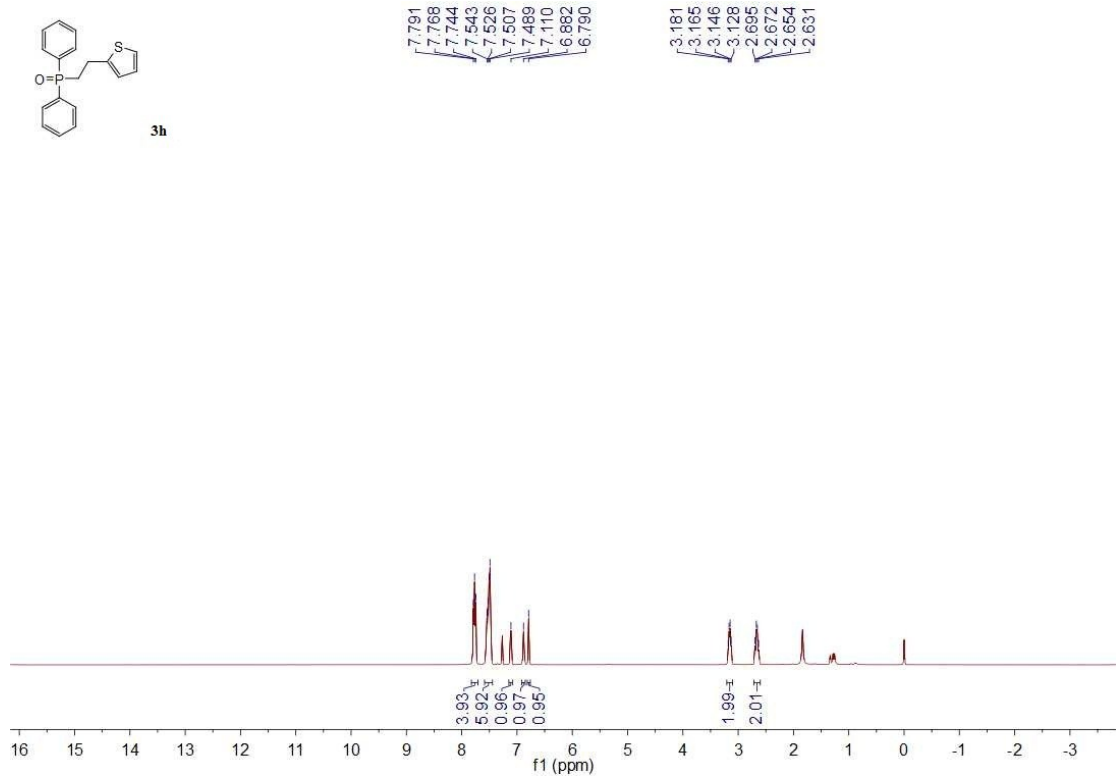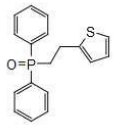

3h

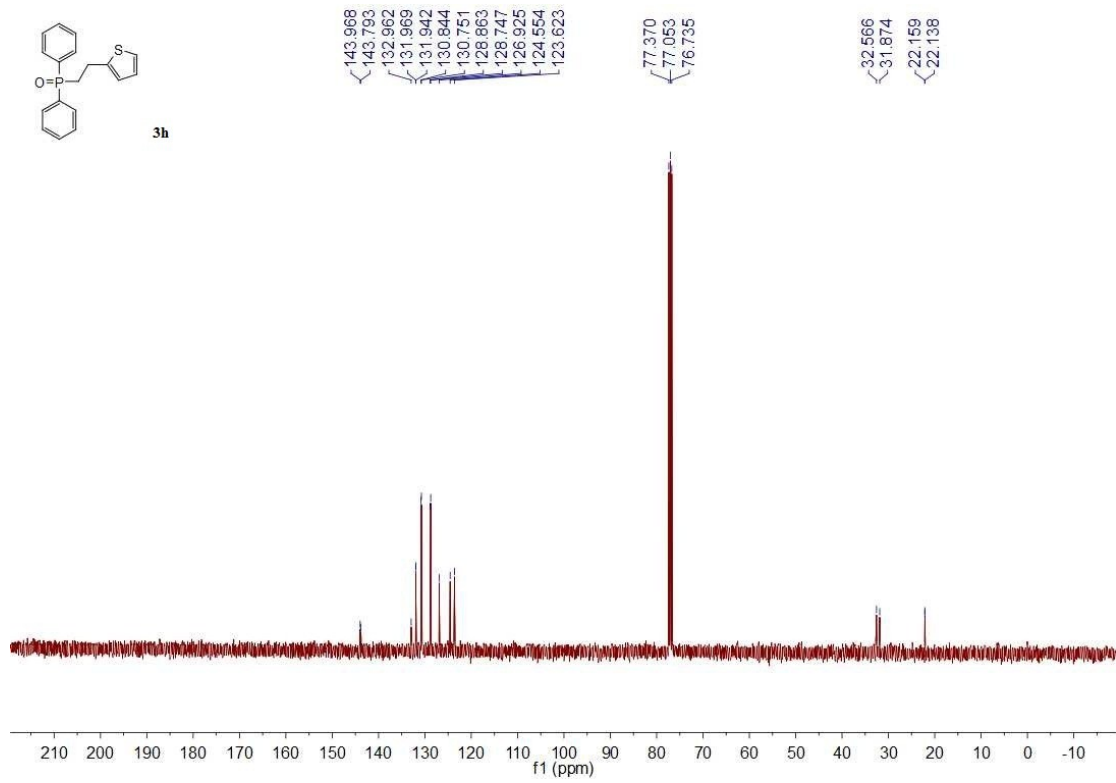

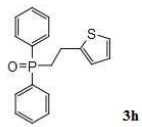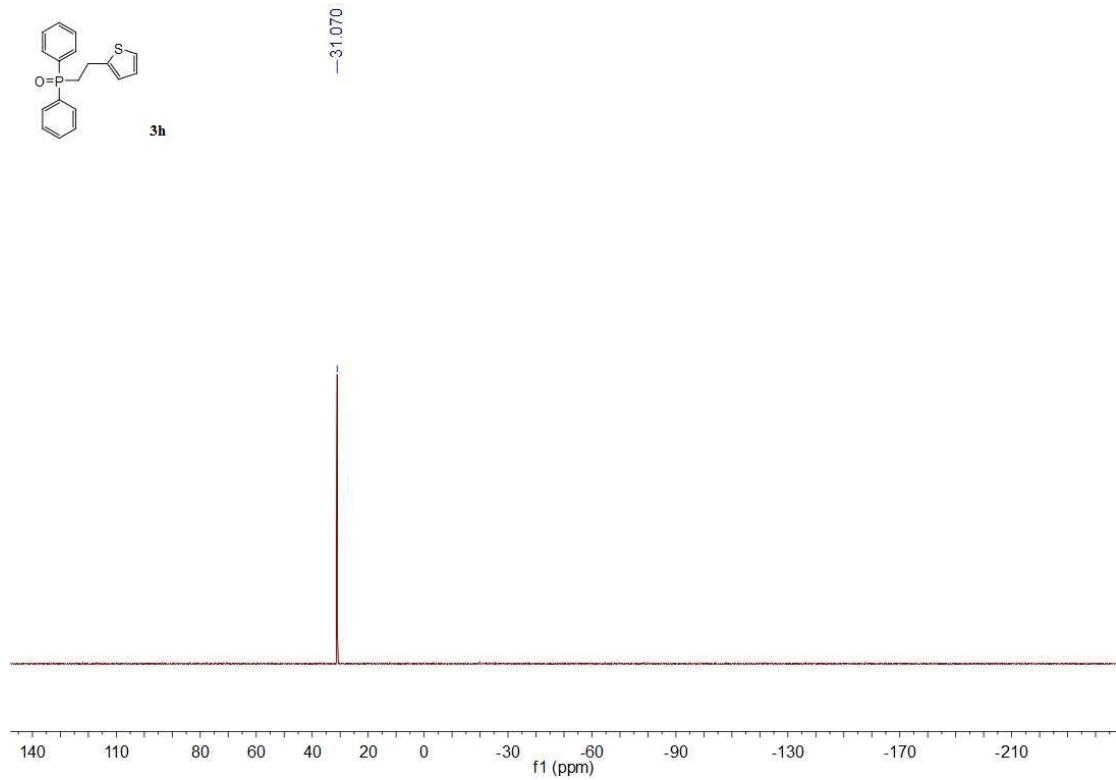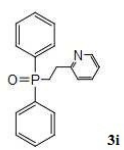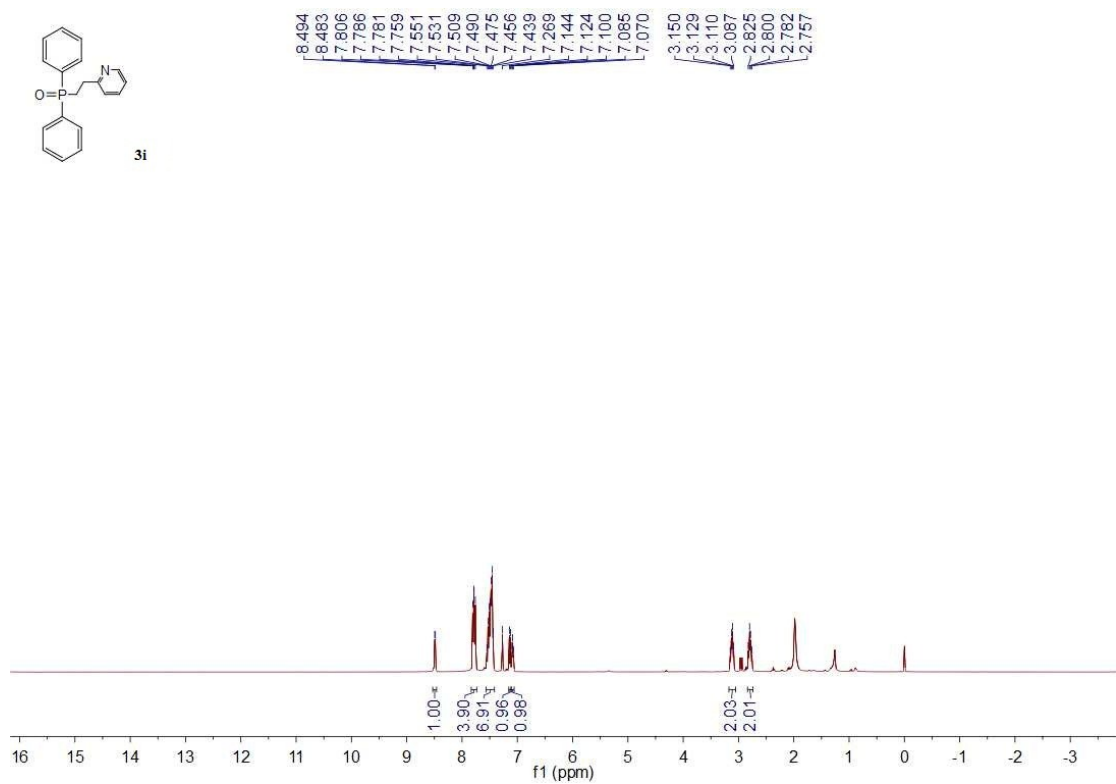

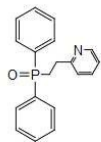

3i

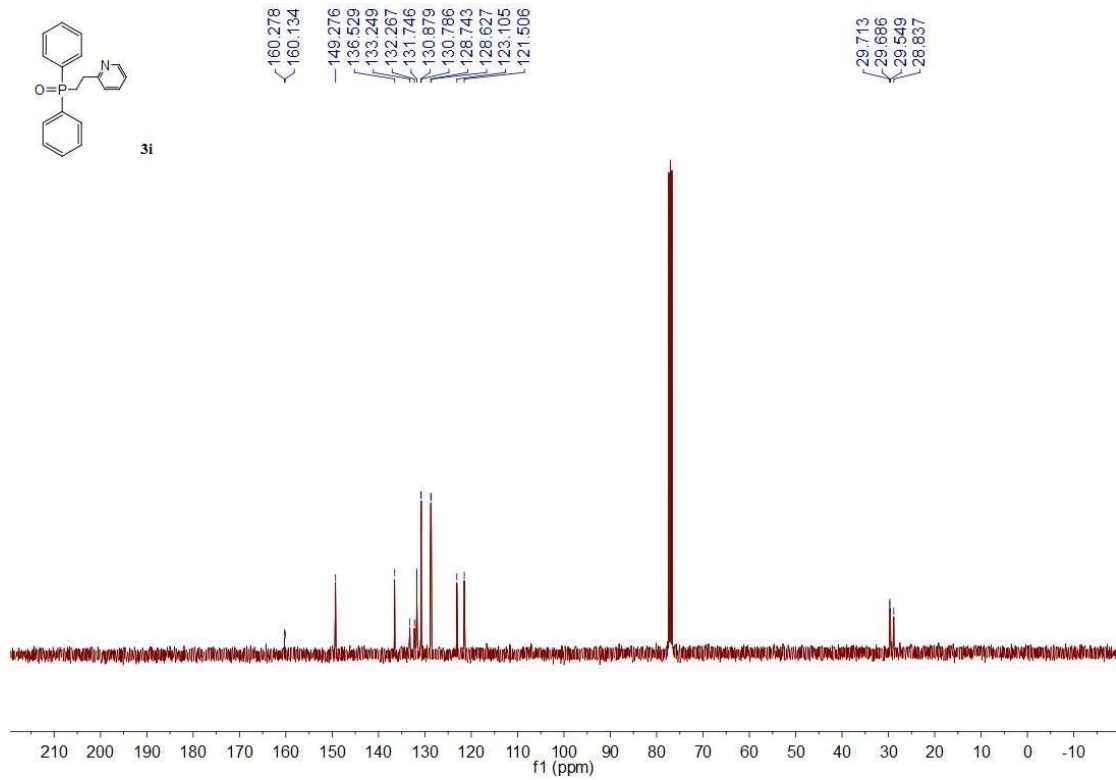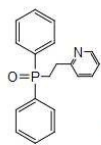

3i

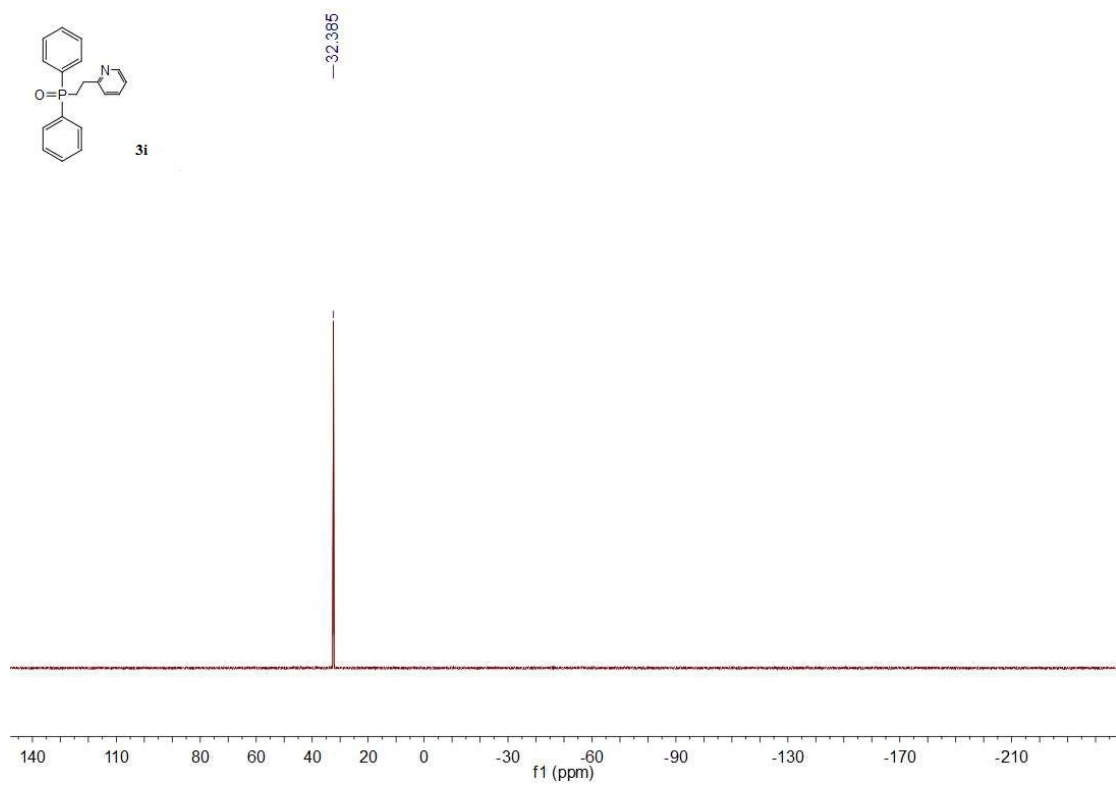

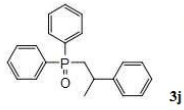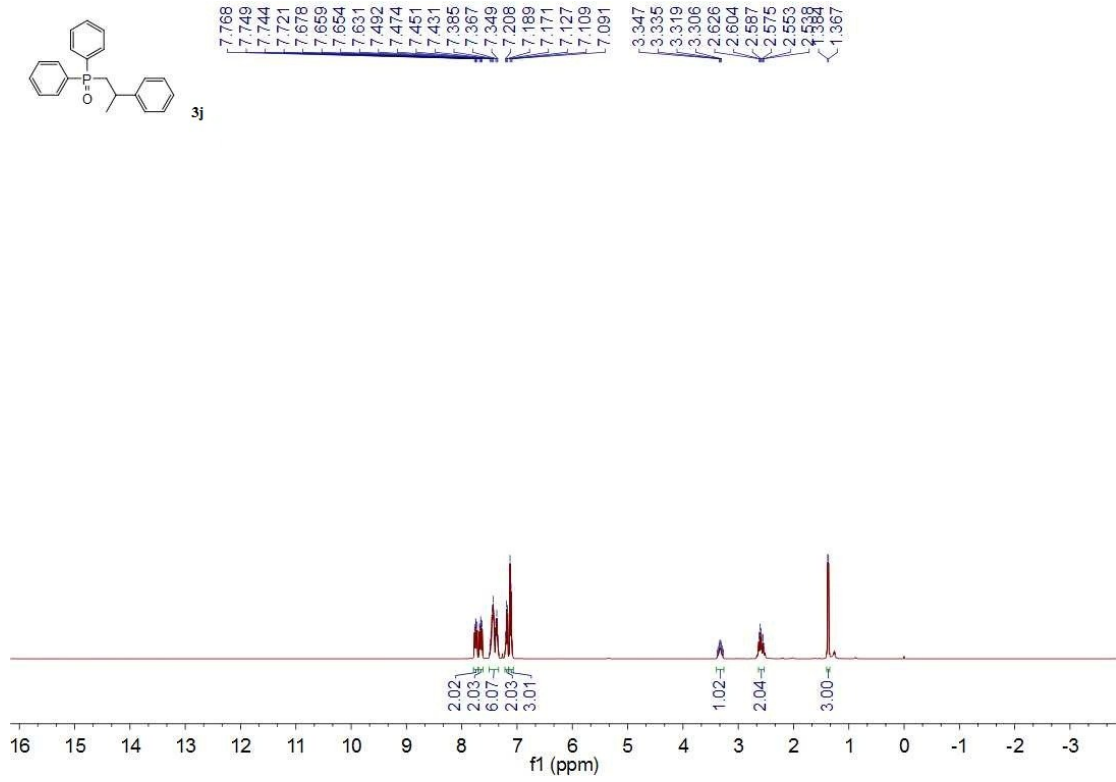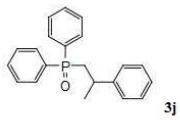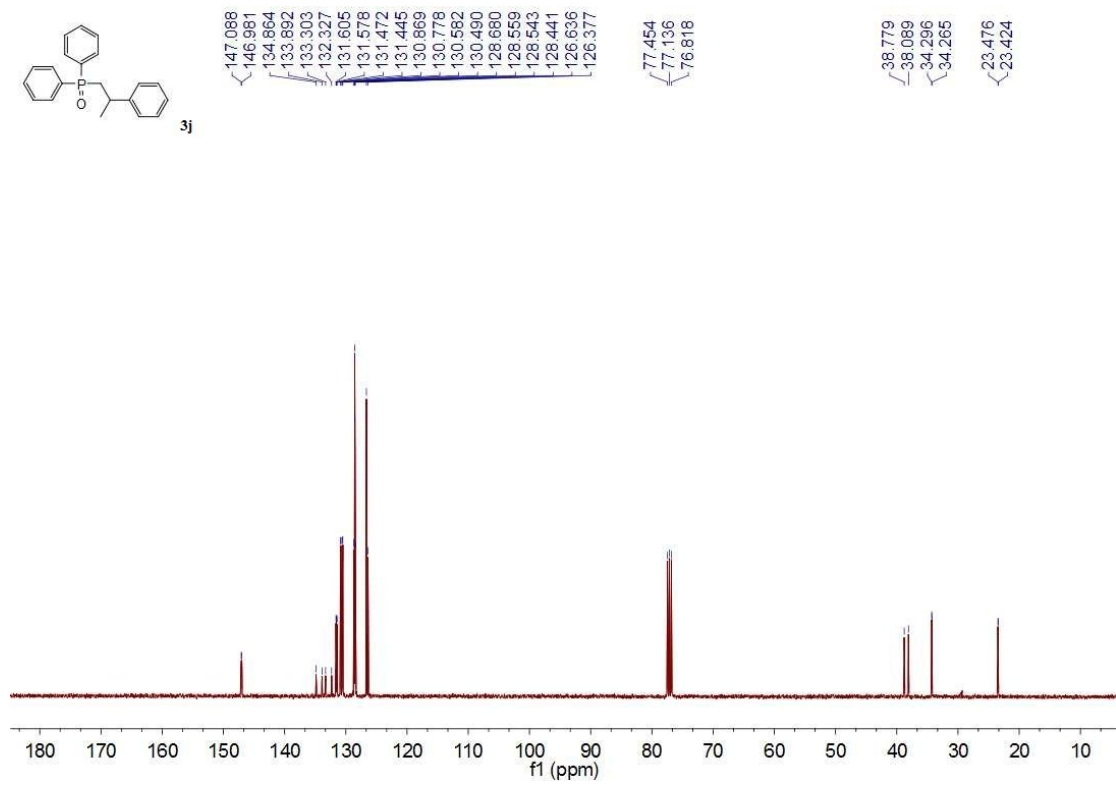



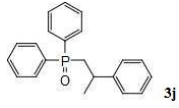

-30.301

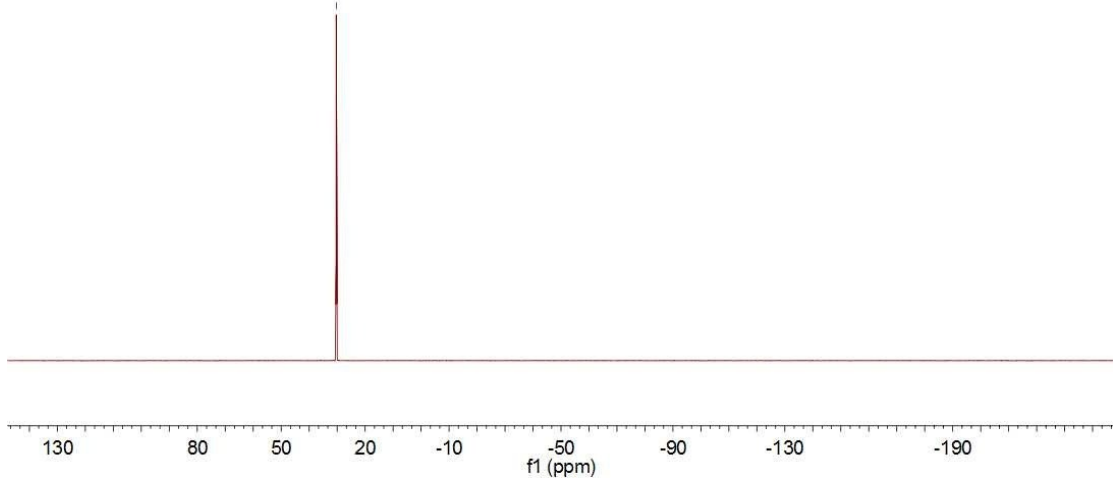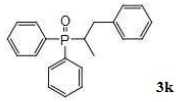

7.912  
7.888  
7.867  
7.853  
7.829  
7.807  
7.547  
7.520  
7.508  
7.490  
7.470  
7.454  
7.280  
7.262  
7.244  
7.204  
7.186  
7.168  
7.117  
7.098

3.069  
3.046  
3.019  
2.665  
2.650  
2.635  
2.620  
2.598  
2.589  
1.078  
1.051  
1.036

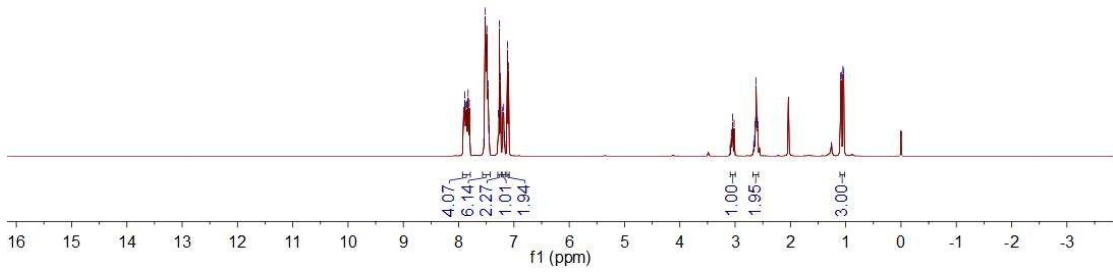

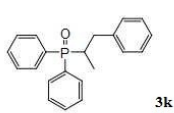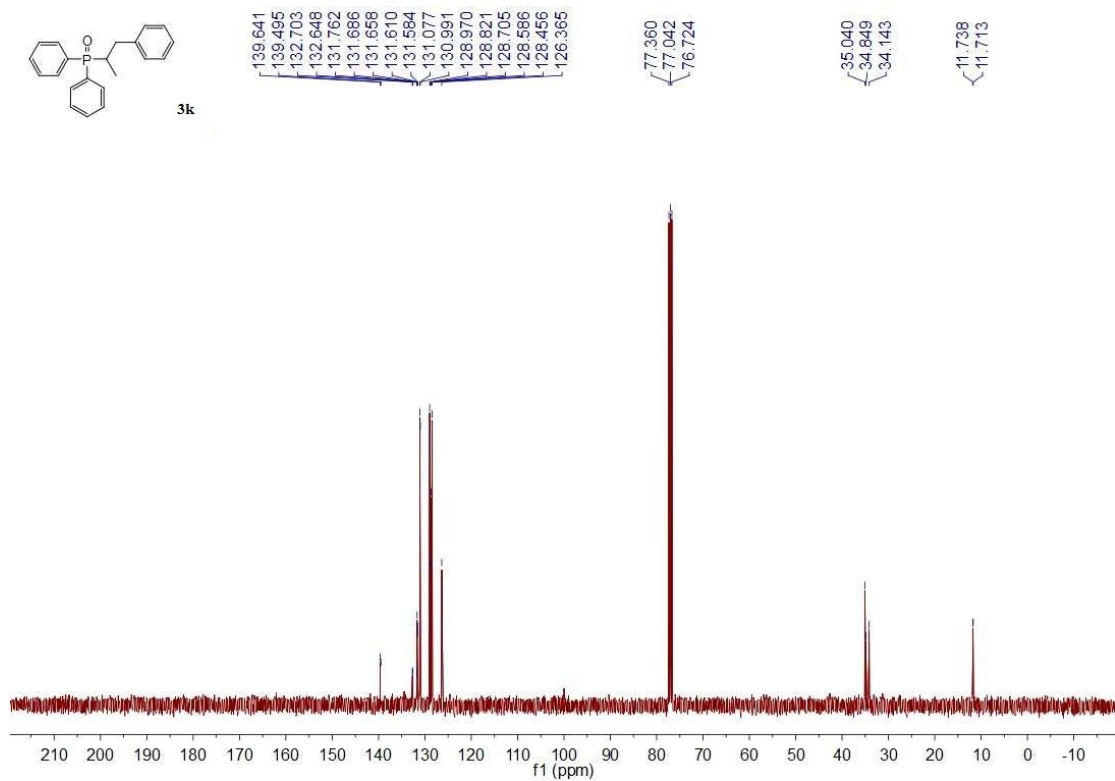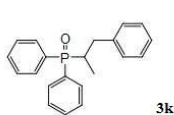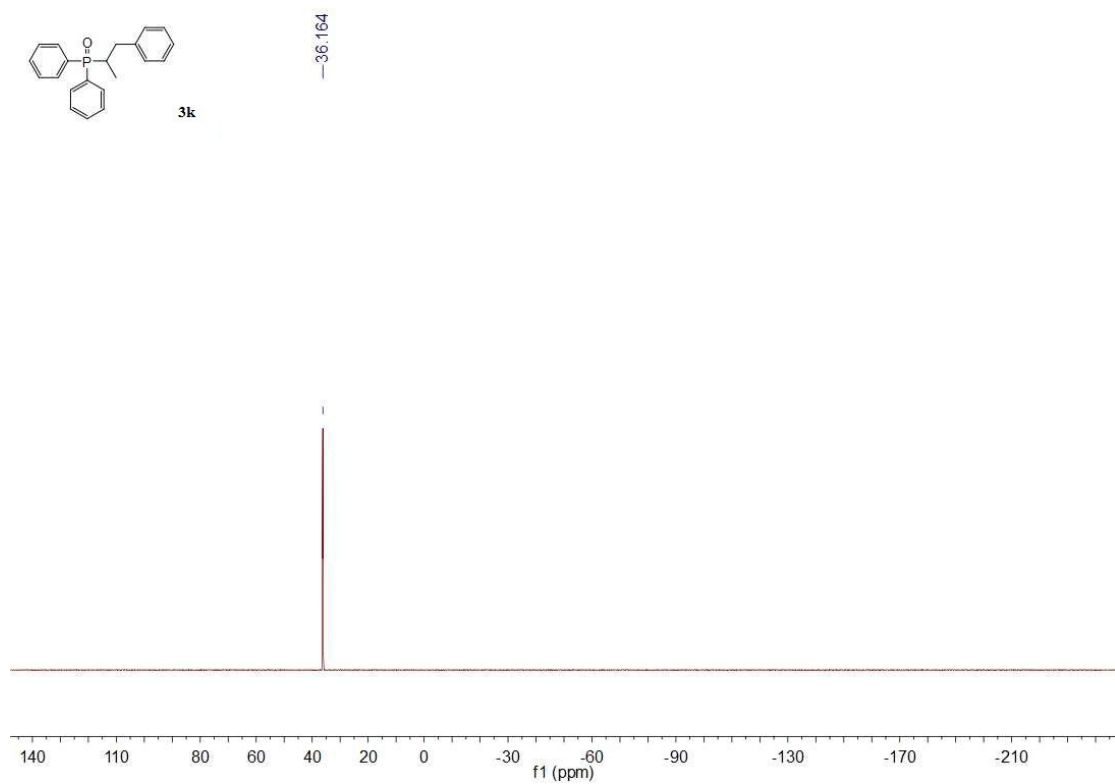

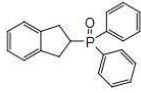

31

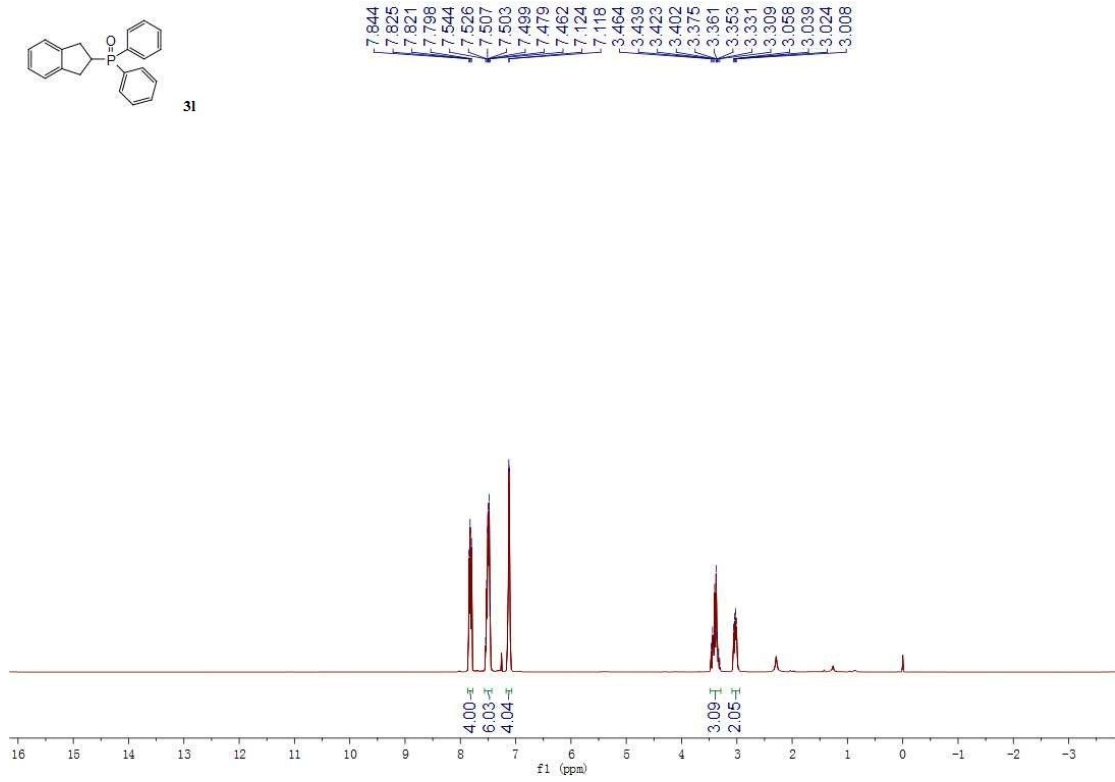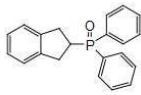

31

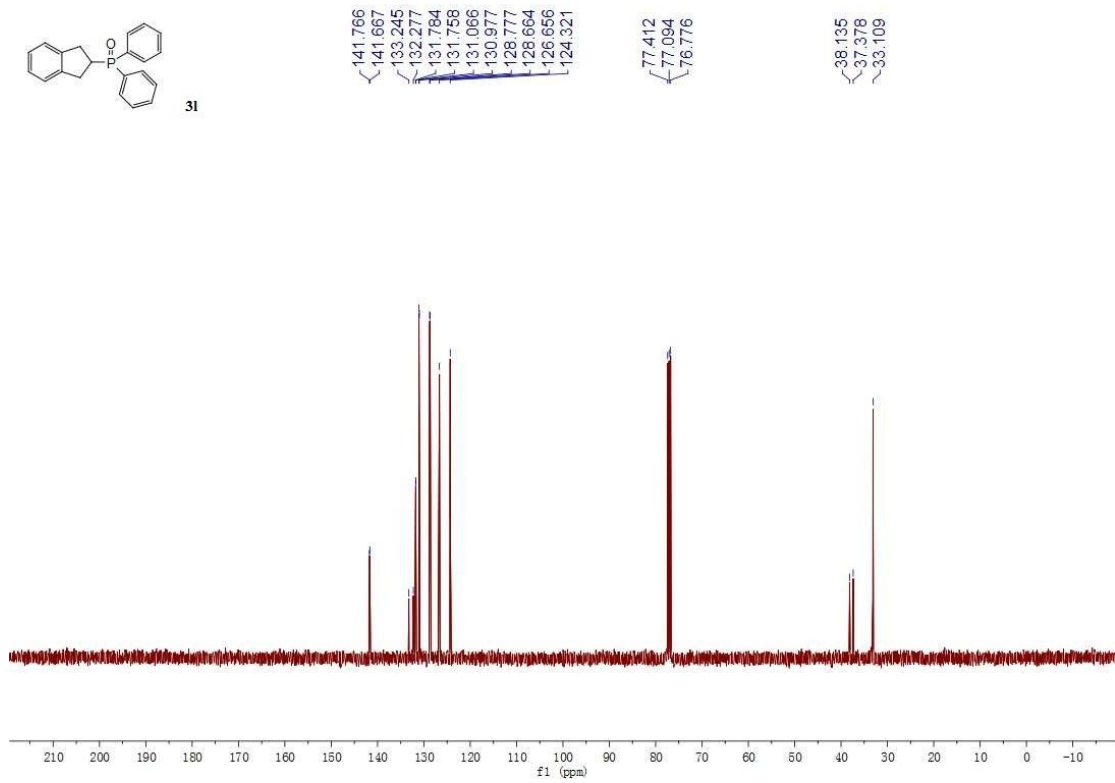

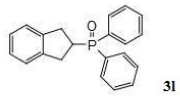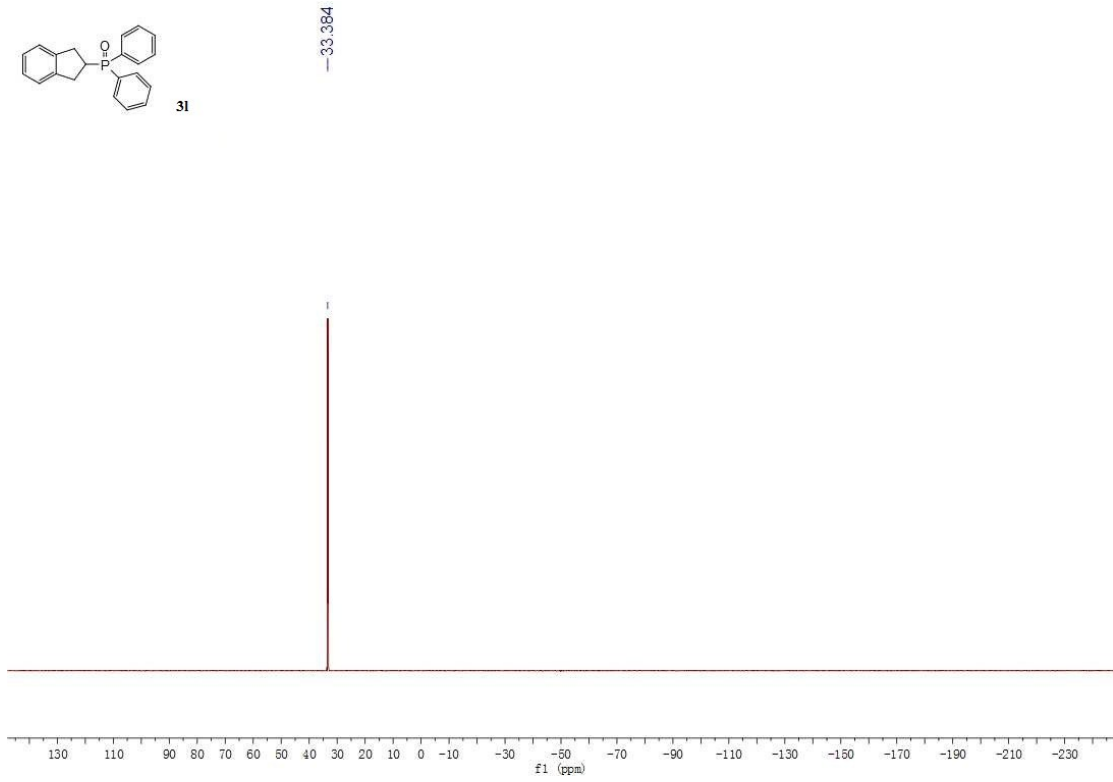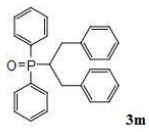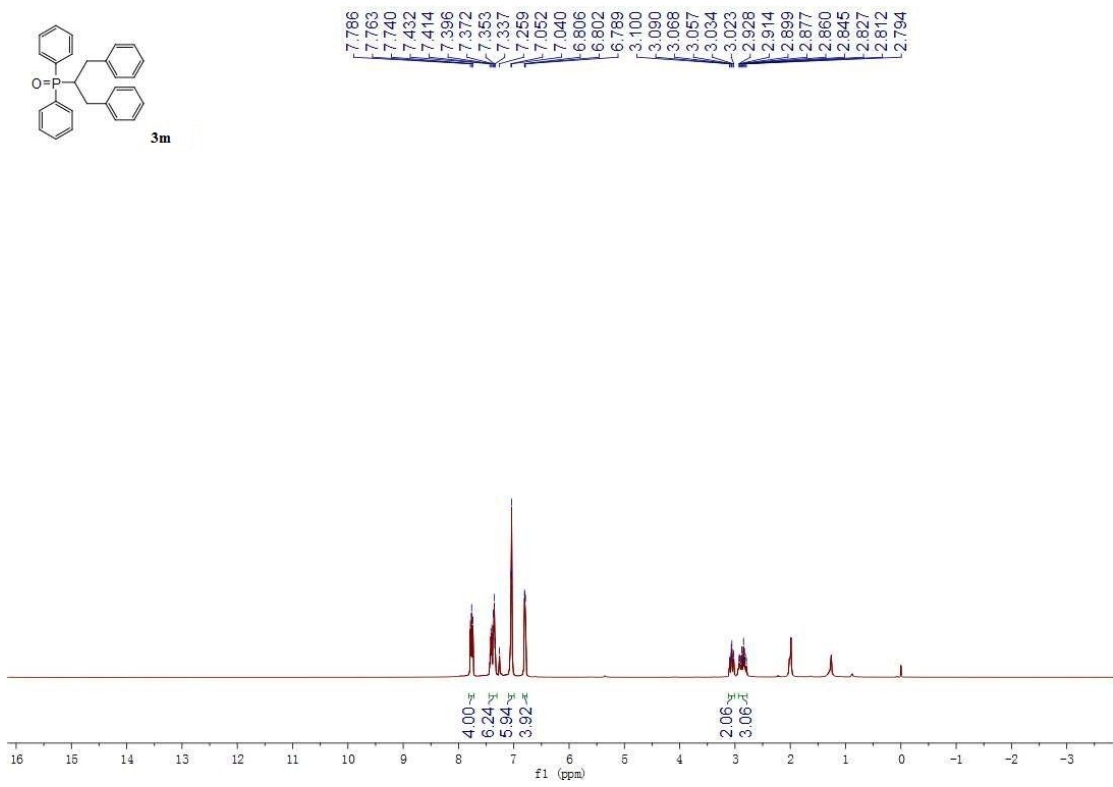

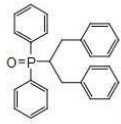

139.760  
139.669  
133.021  
132.082  
131.416  
131.390  
130.868  
130.781  
128.955  
128.588  
128.475  
128.197  
126.060

77.369  
77.052  
76.734

42.499  
41.810  
33.769

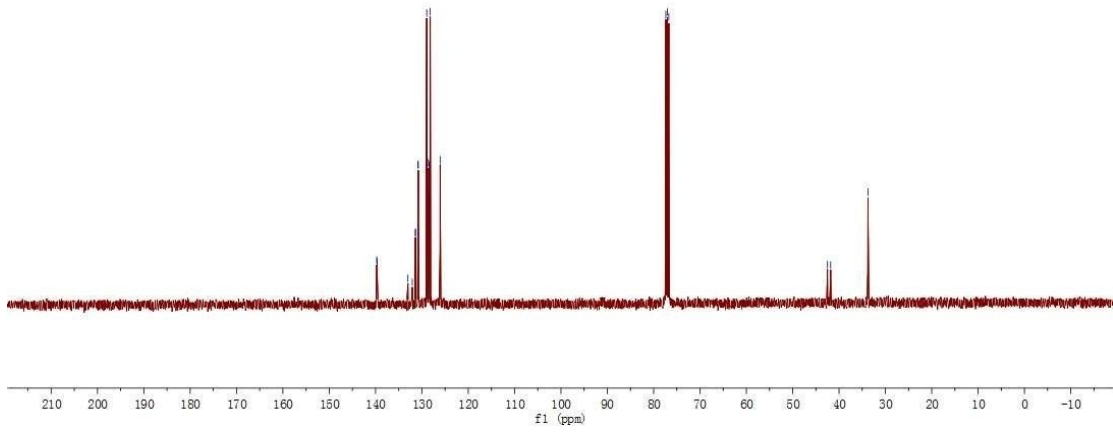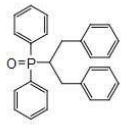

-34.589

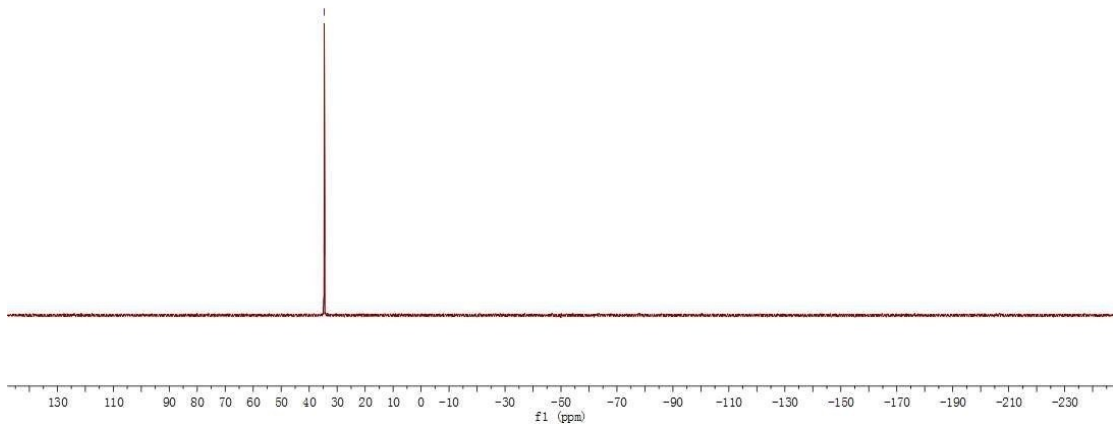

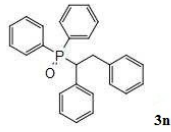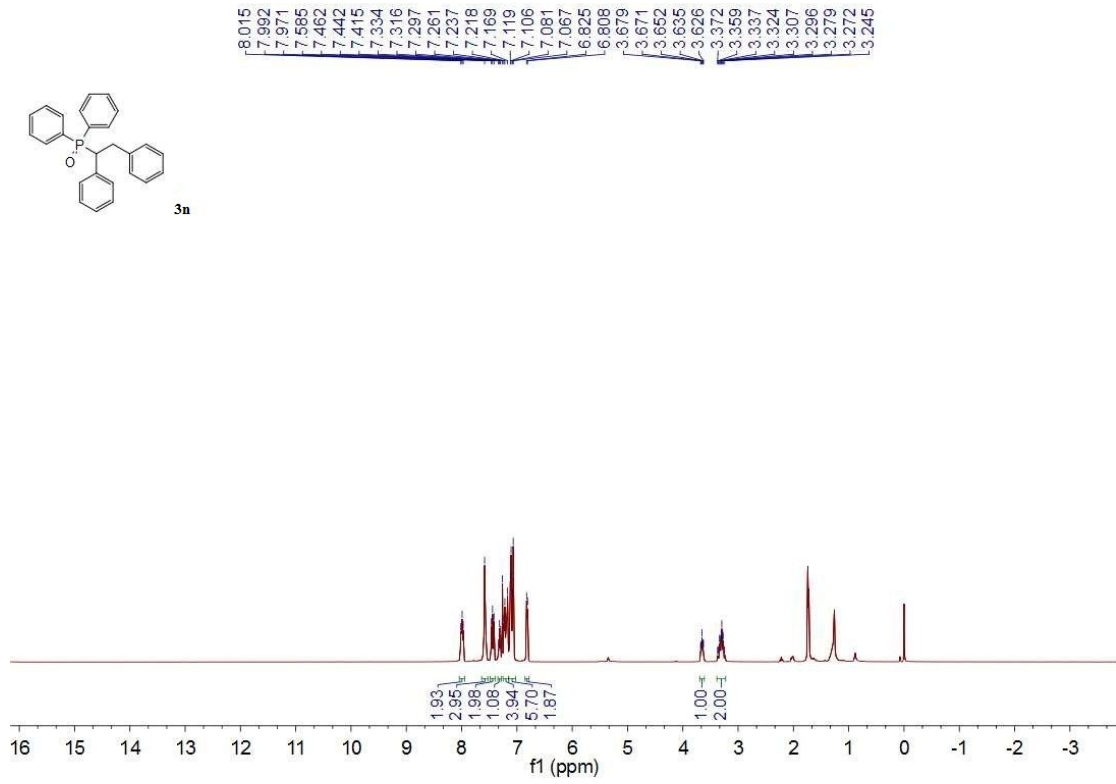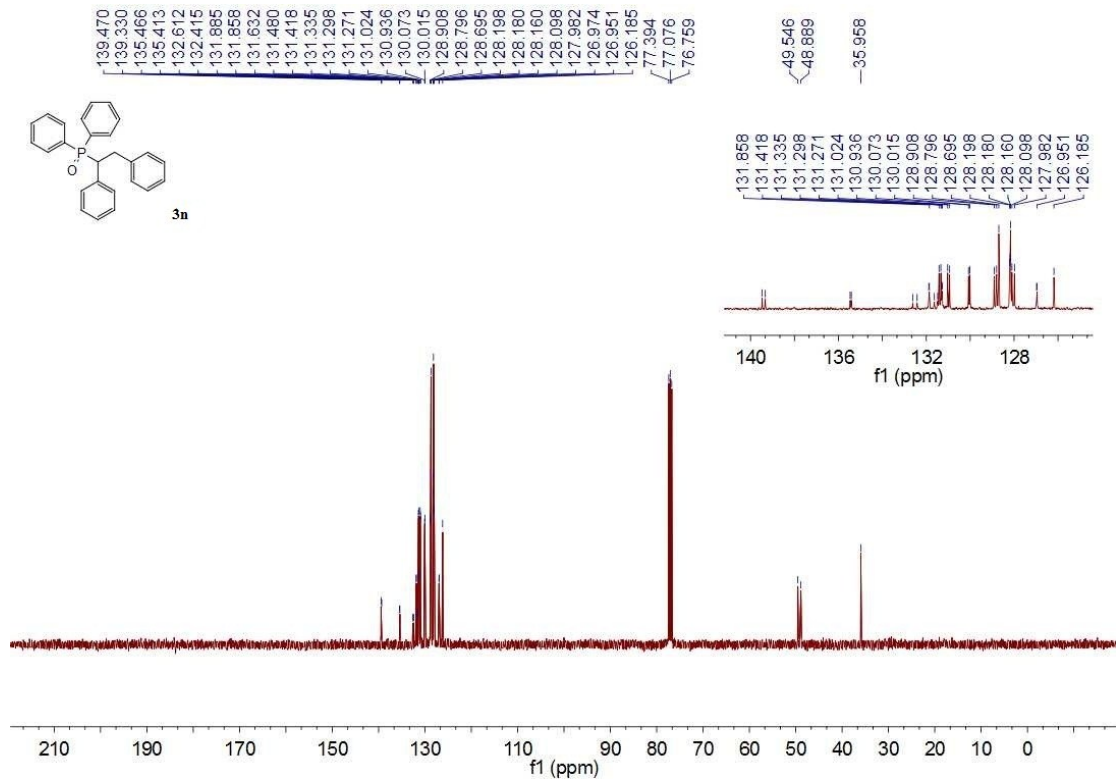

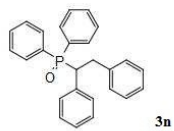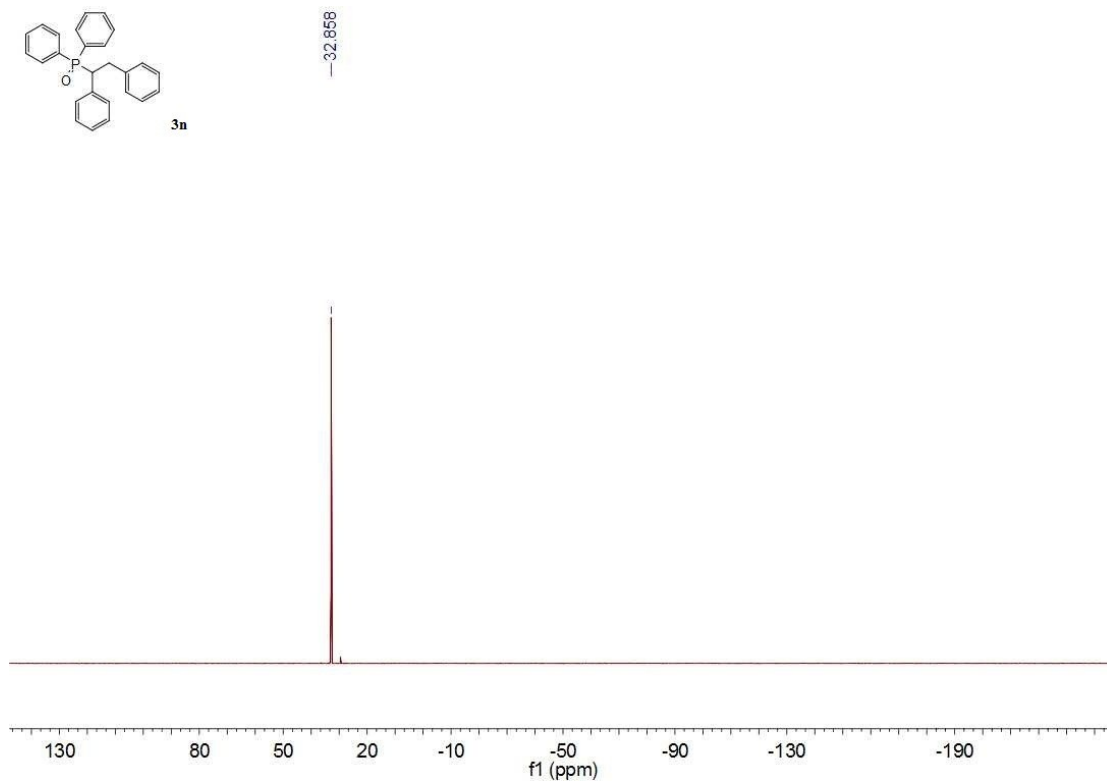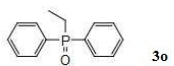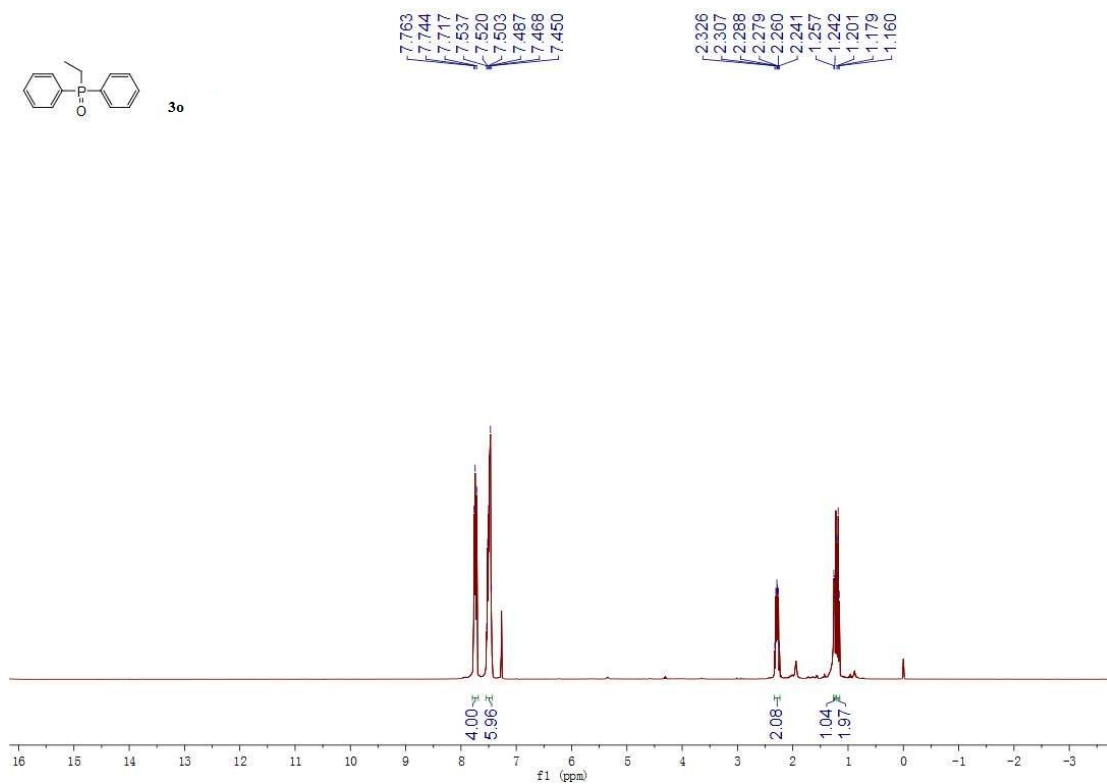

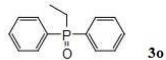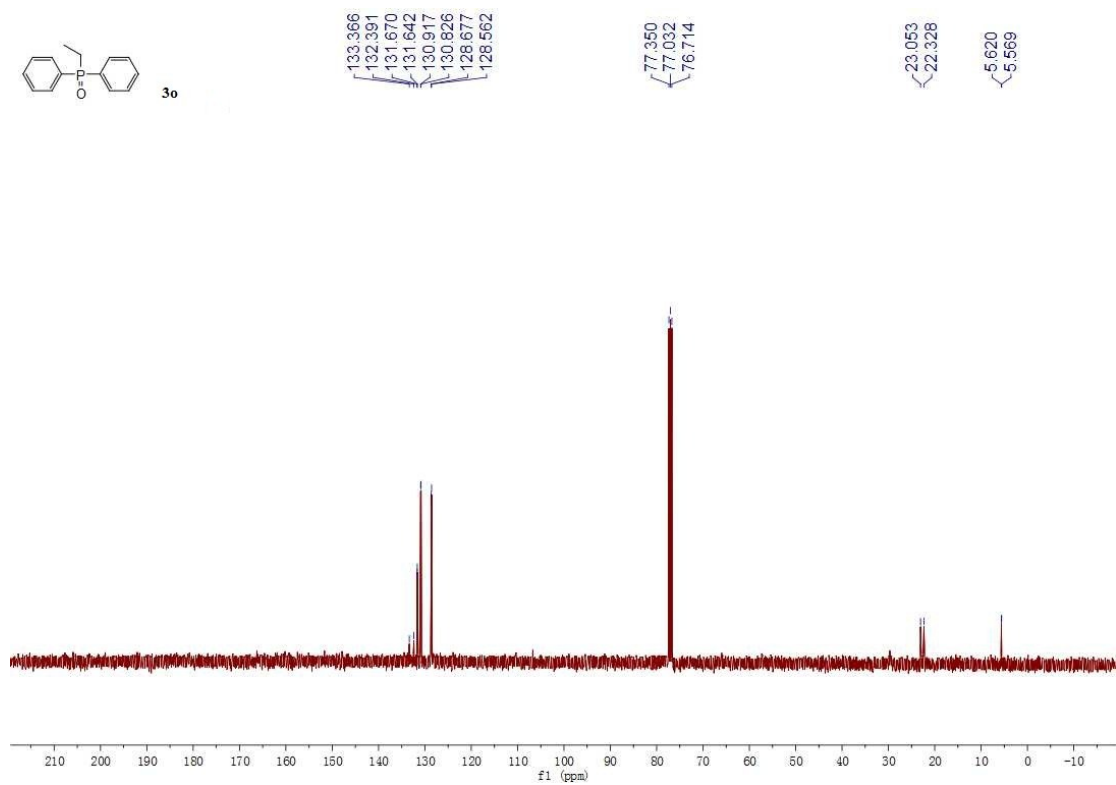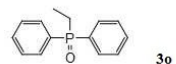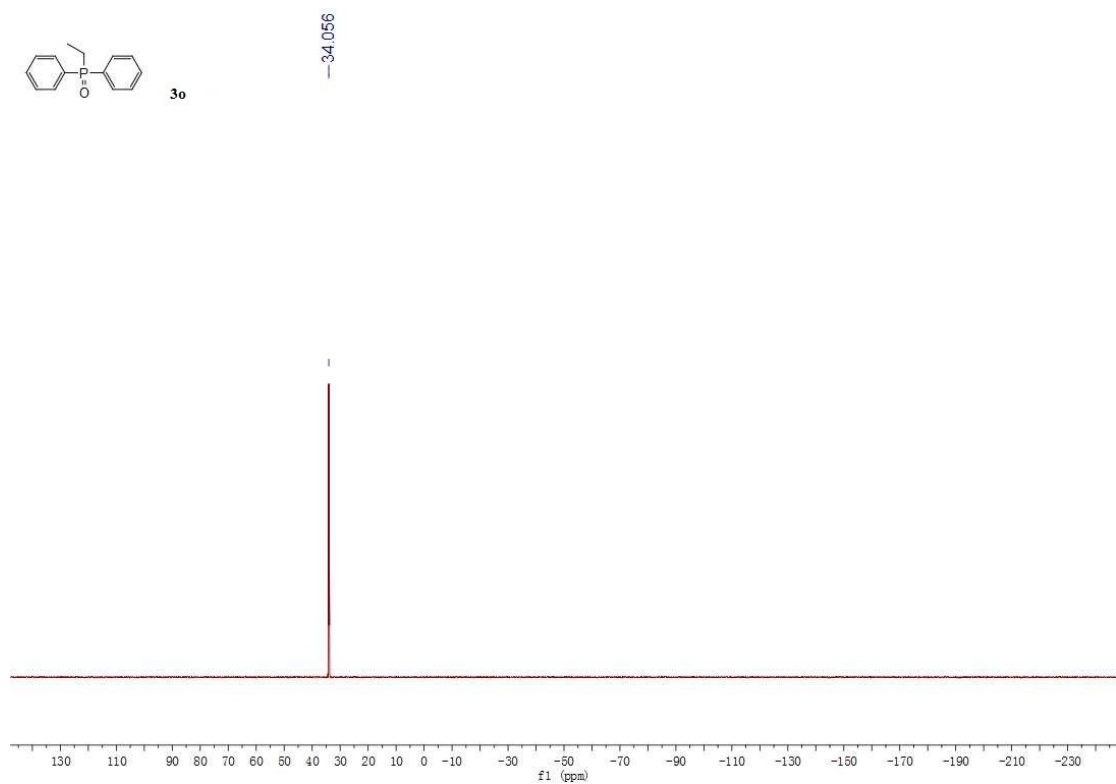



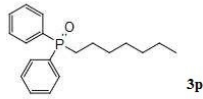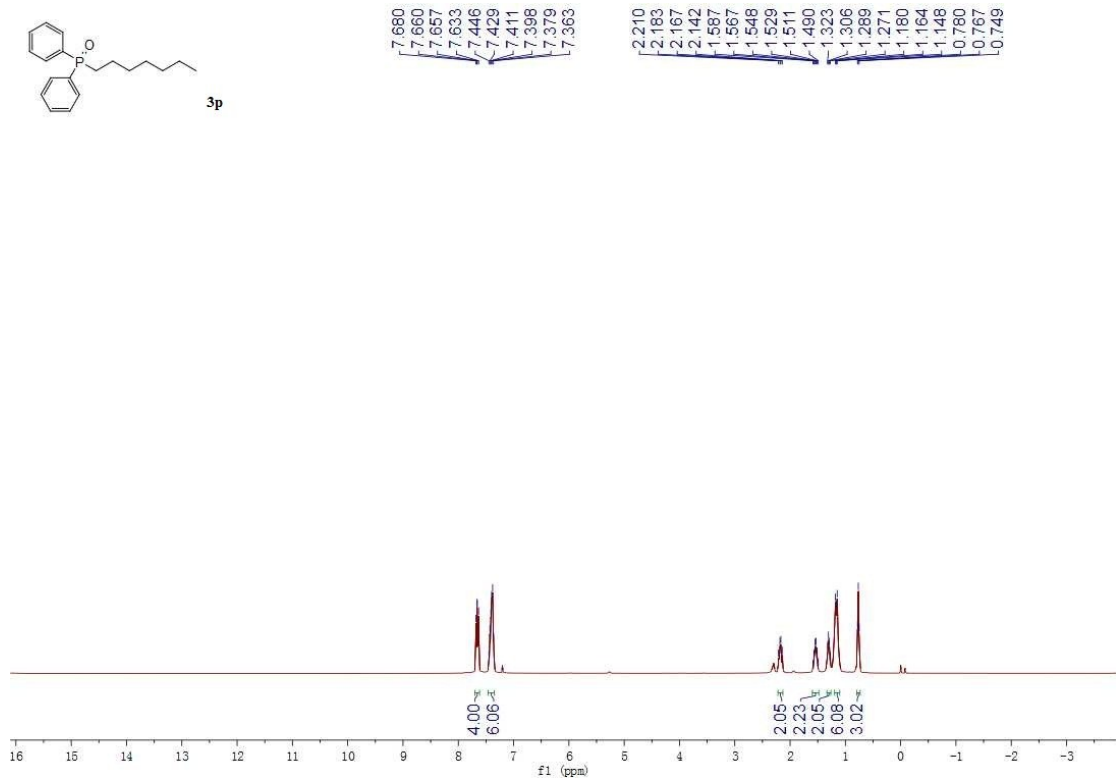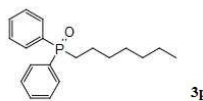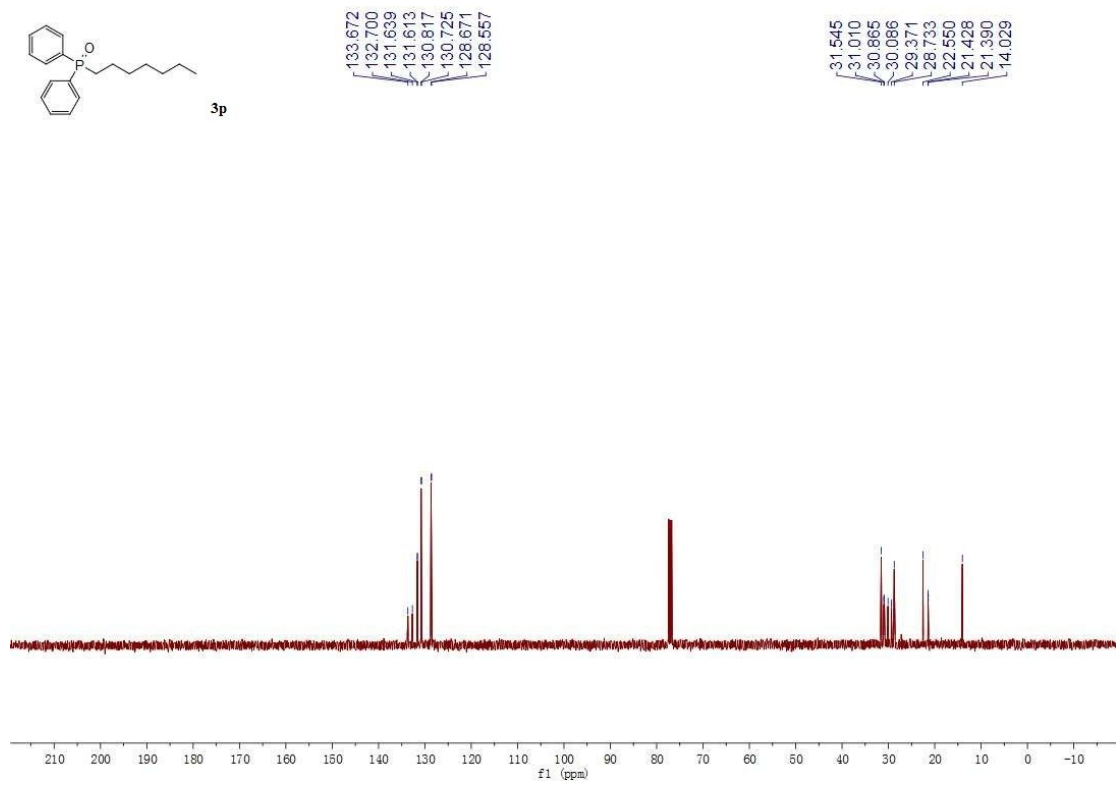

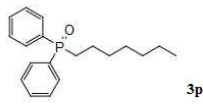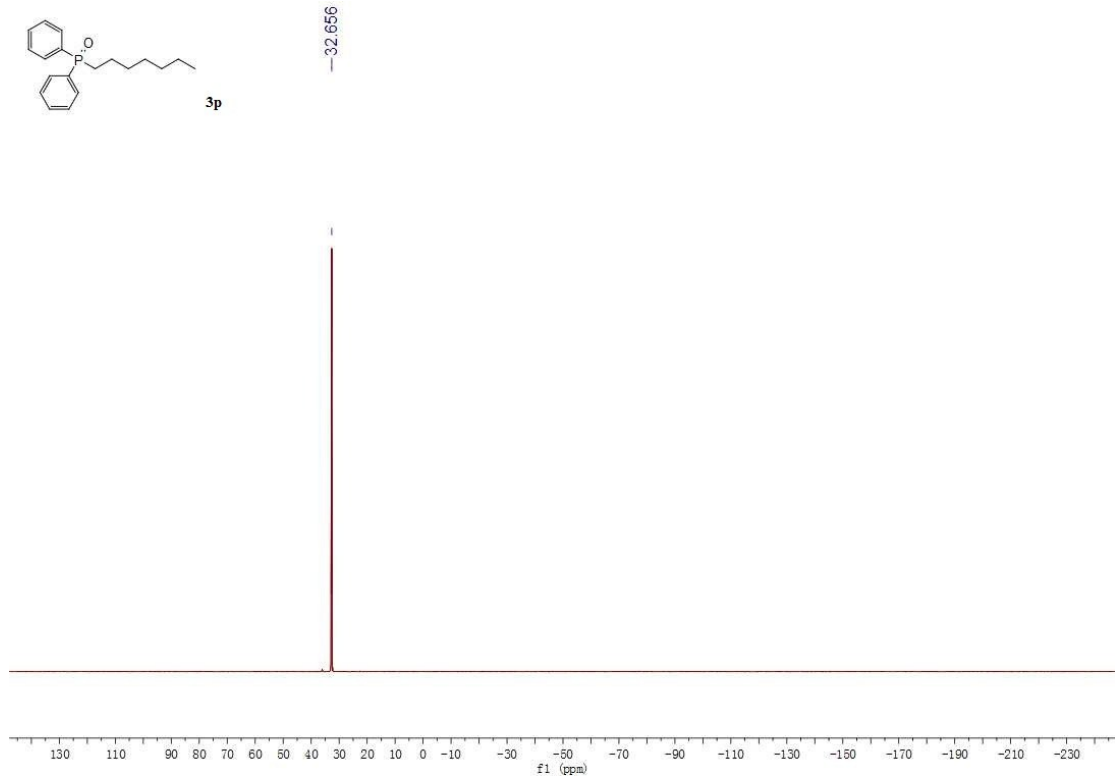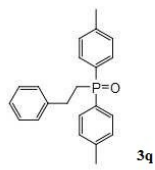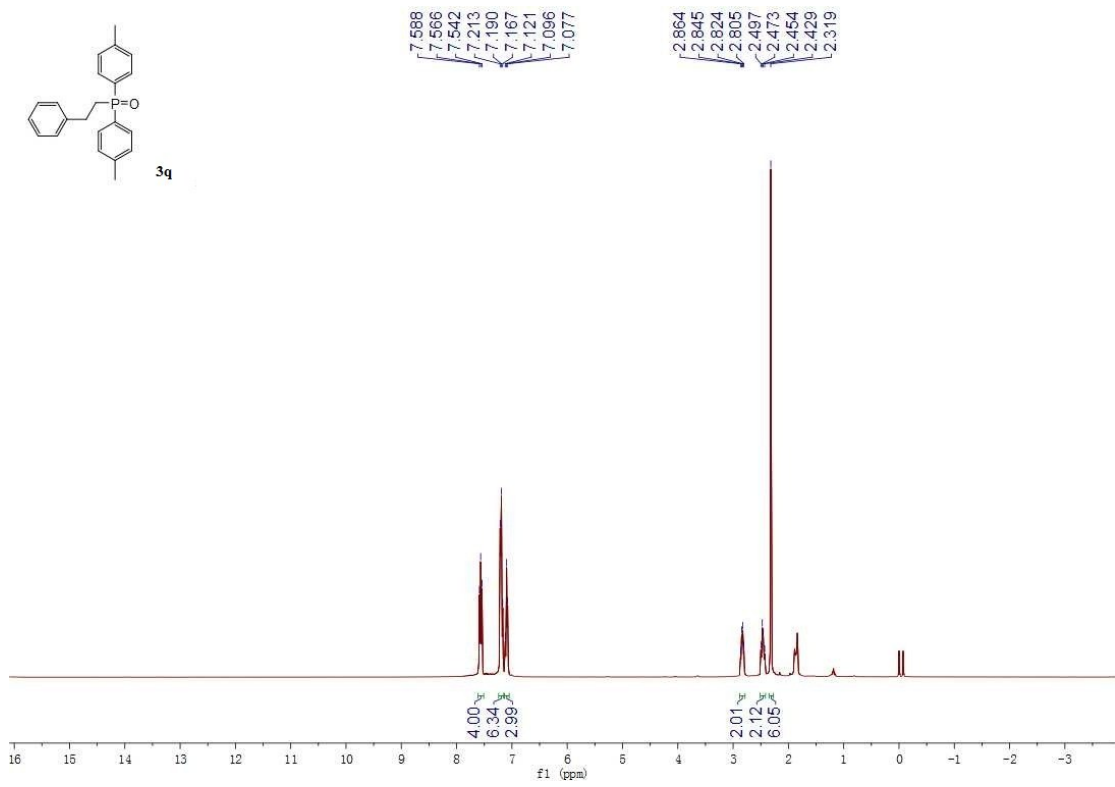

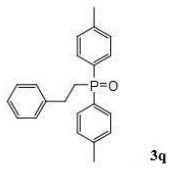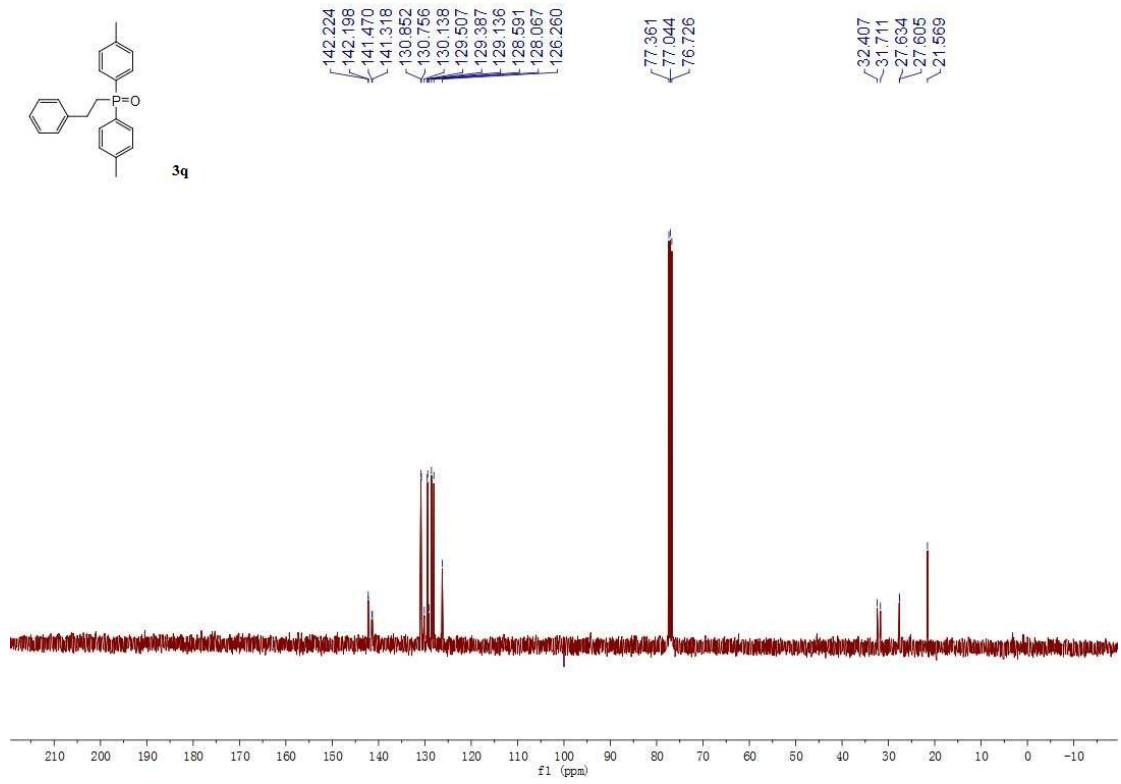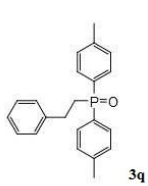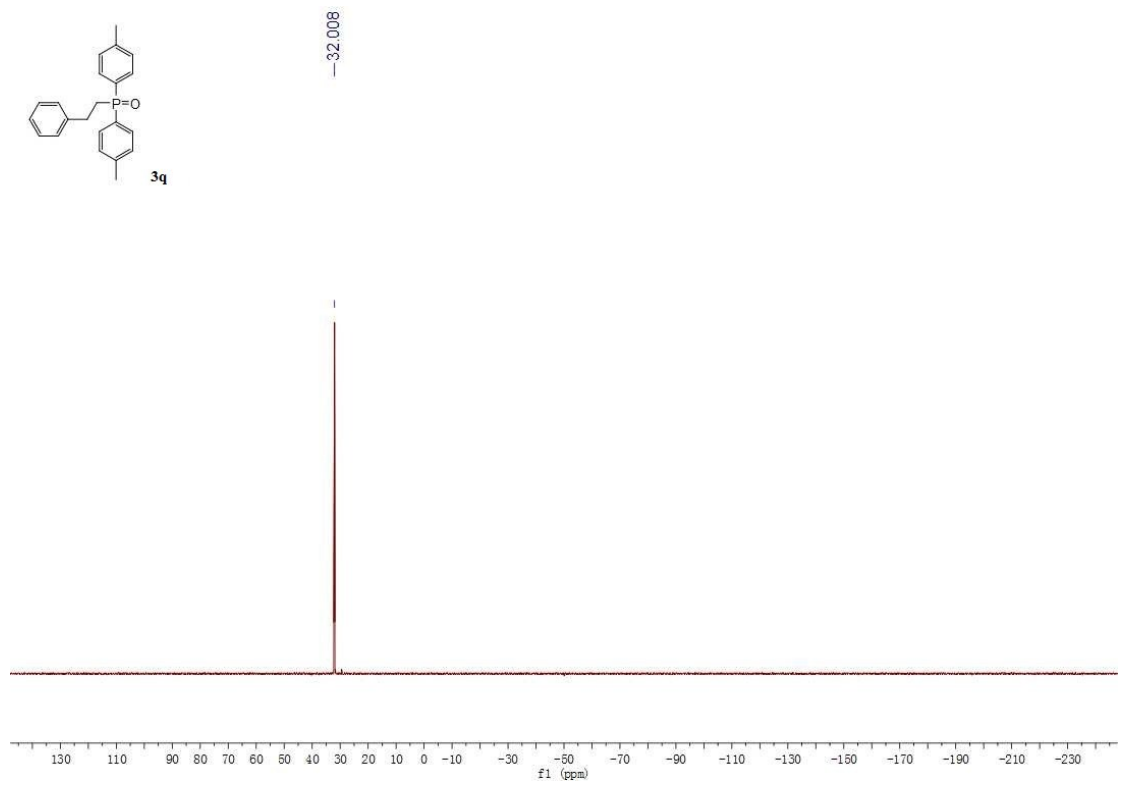

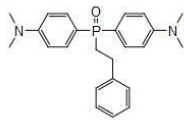

3r

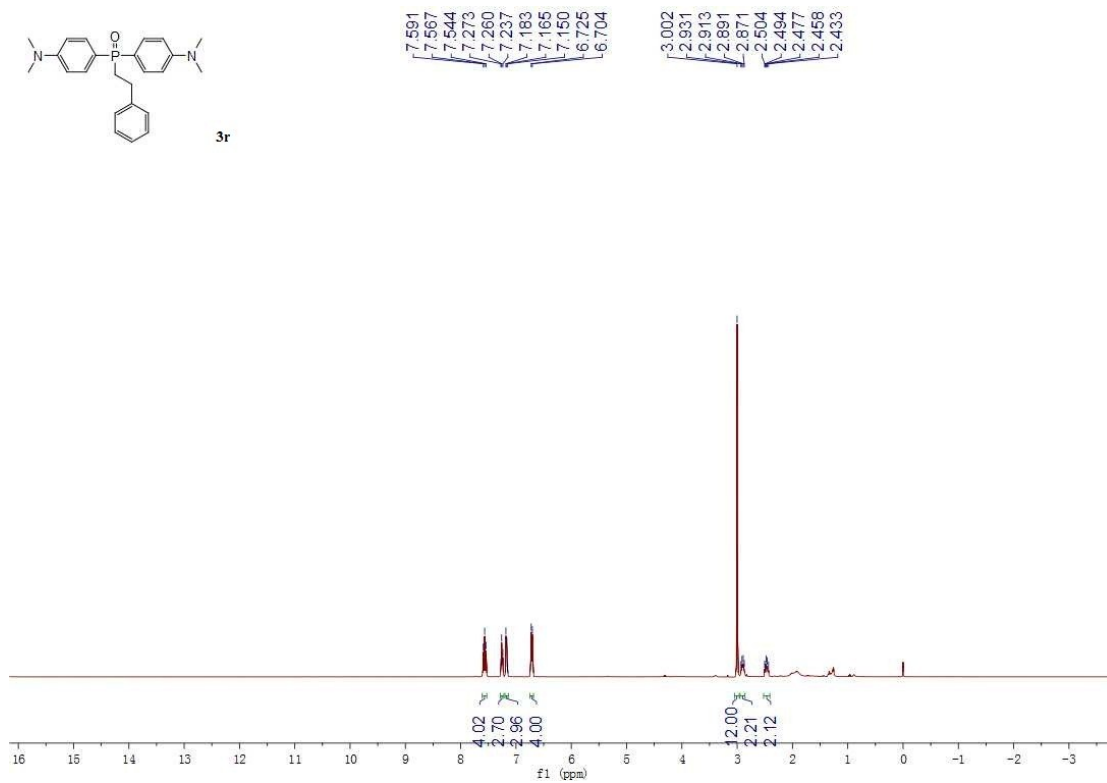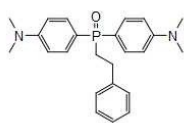

3r

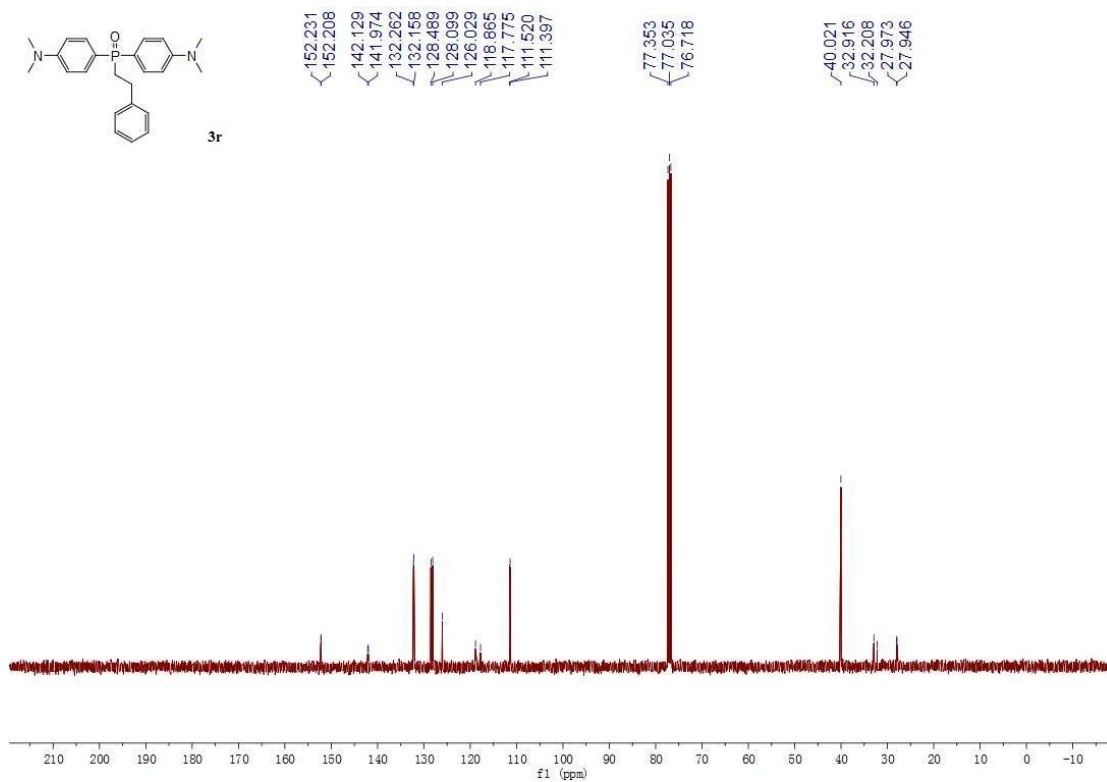

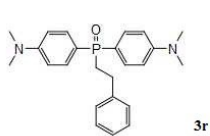

—32.841

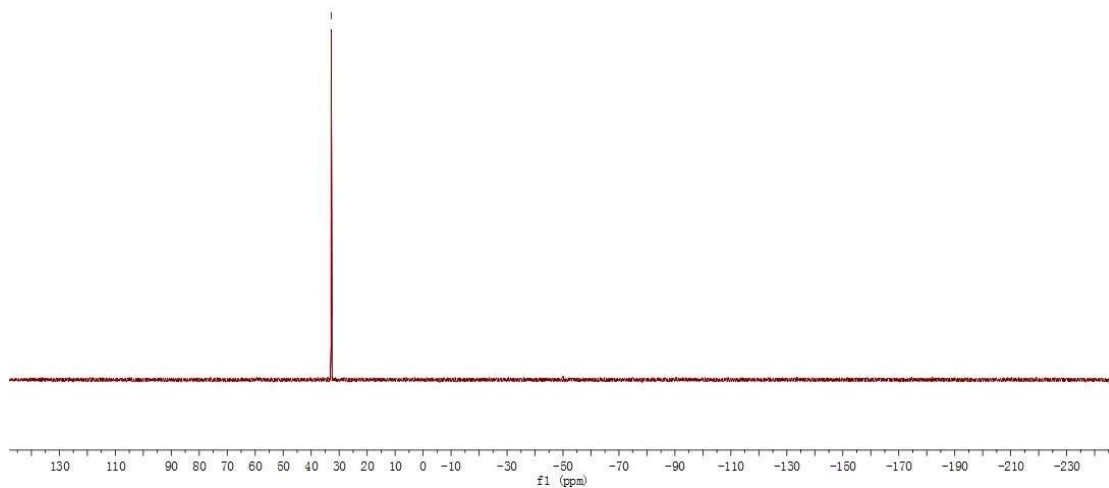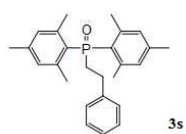

7.194  
7.177  
7.158  
7.112  
7.094  
7.062  
7.044  
6.750

2.787  
2.770  
2.747  
2.730  
2.641  
2.618  
2.599  
2.577  
2.299  
2.185

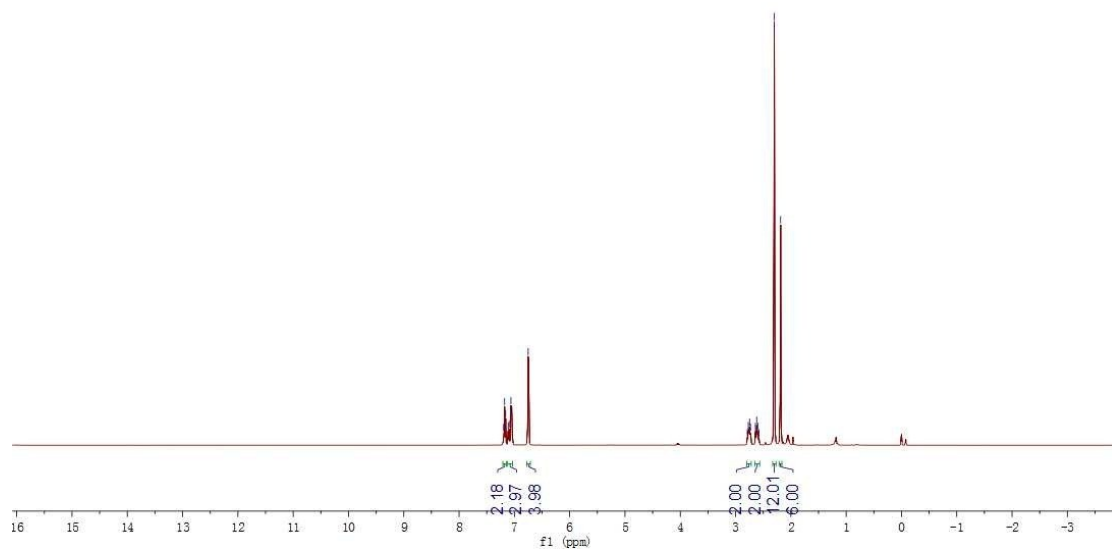

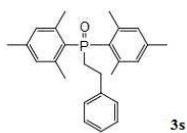

142.039  
141.873  
141.219  
141.120  
140.716  
140.690  
131.151  
131.042  
130.491  
129.556  
128.550  
128.270  
126.140

77.381  
77.064  
76.746

38.564  
37.920  
28.852  
28.827  
22.943  
20.937

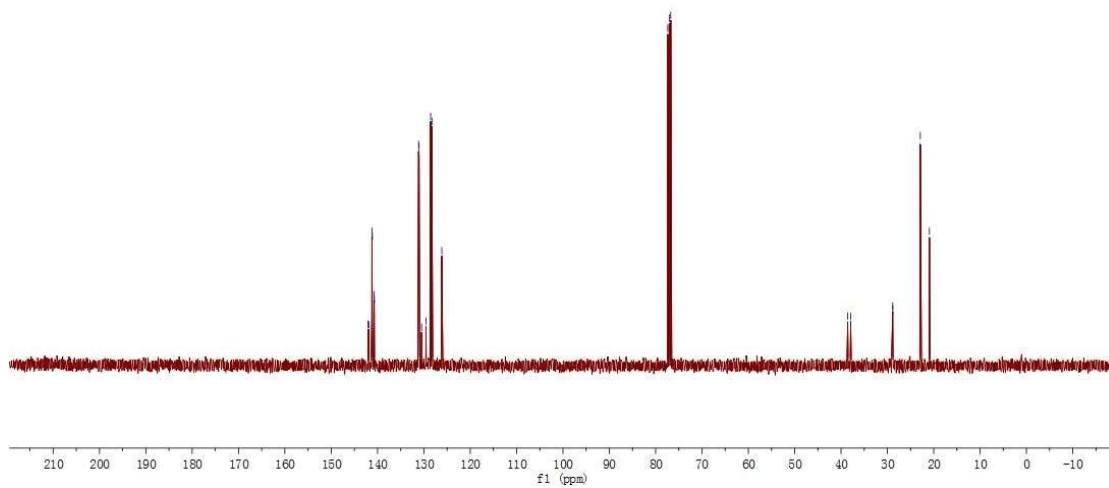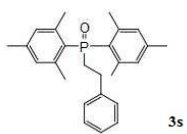

40.391

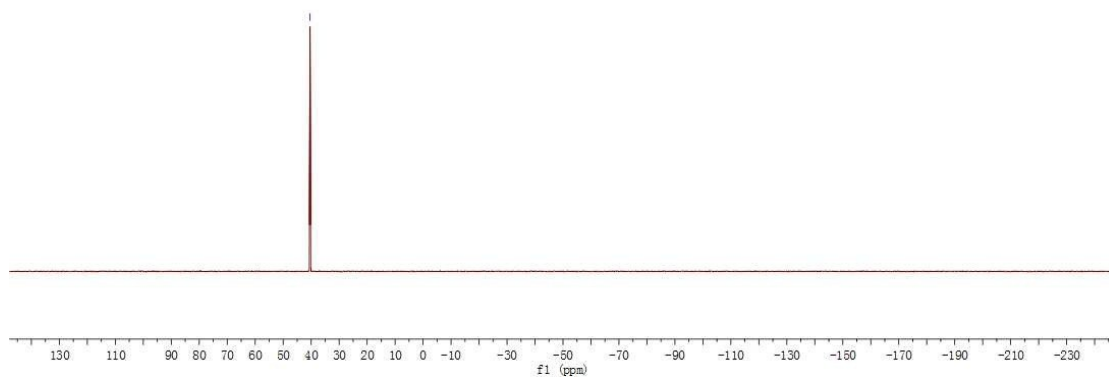

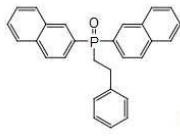

3t

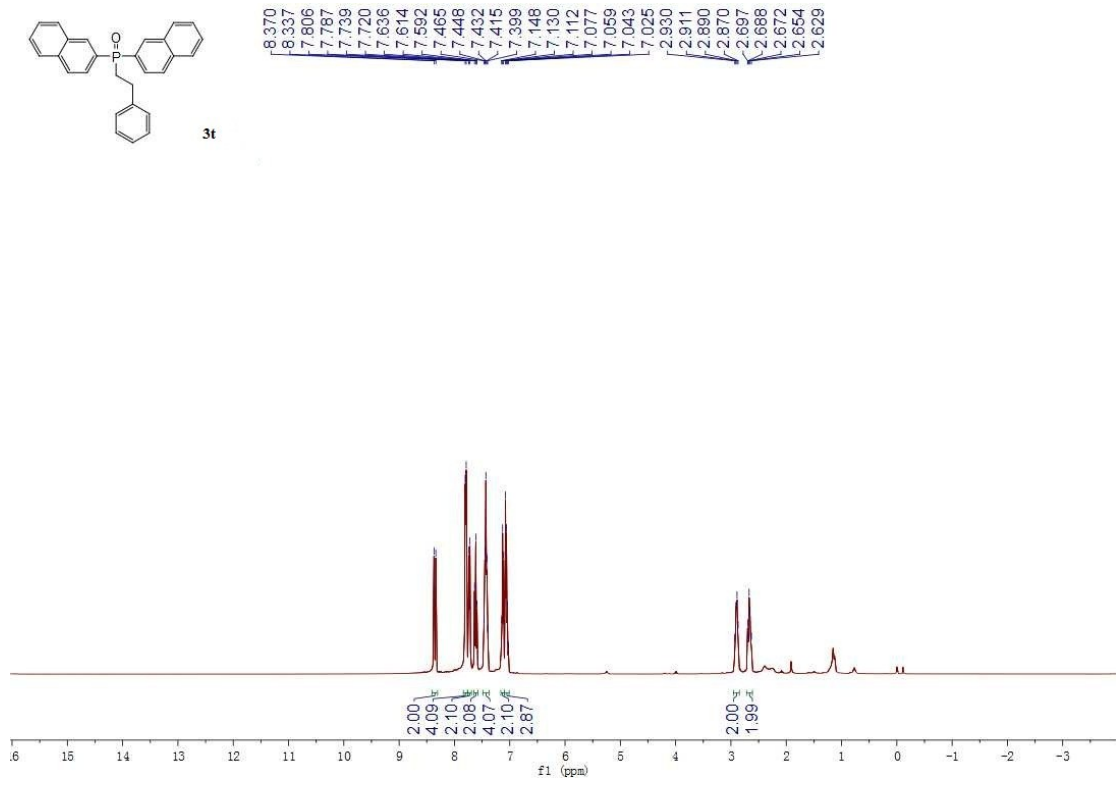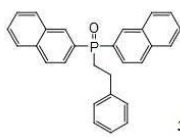

3t

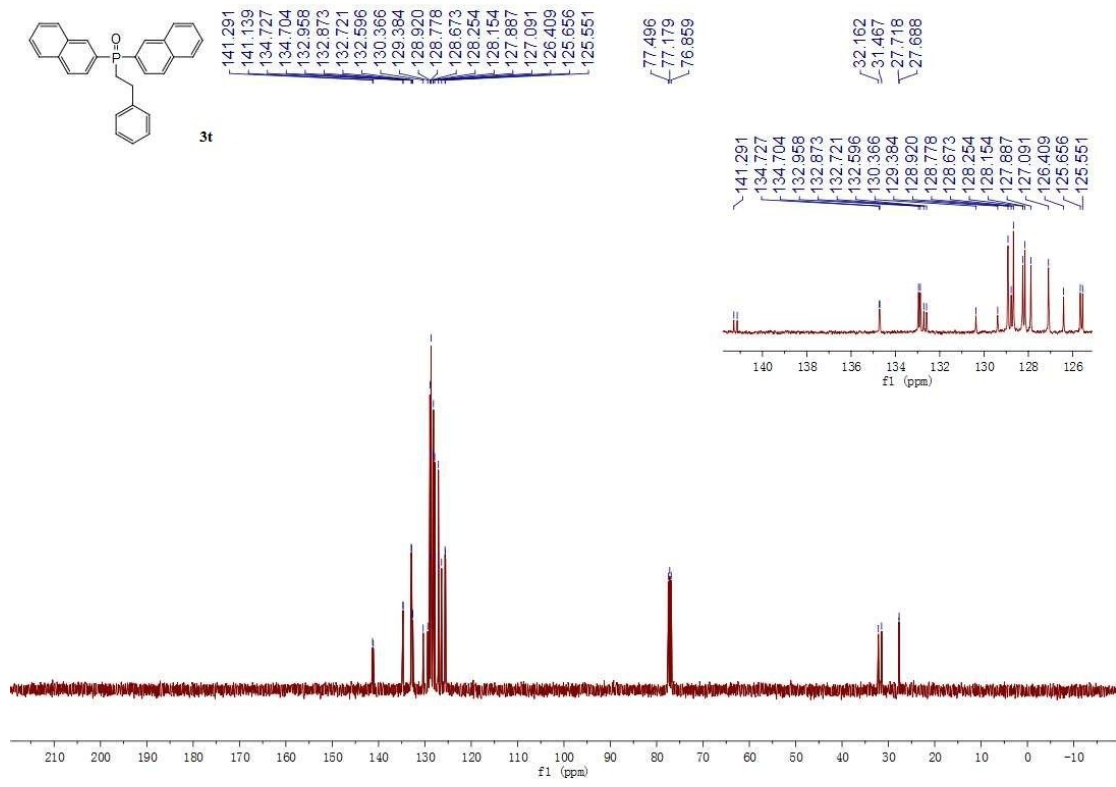

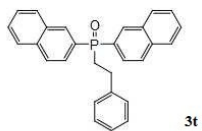

-31.993

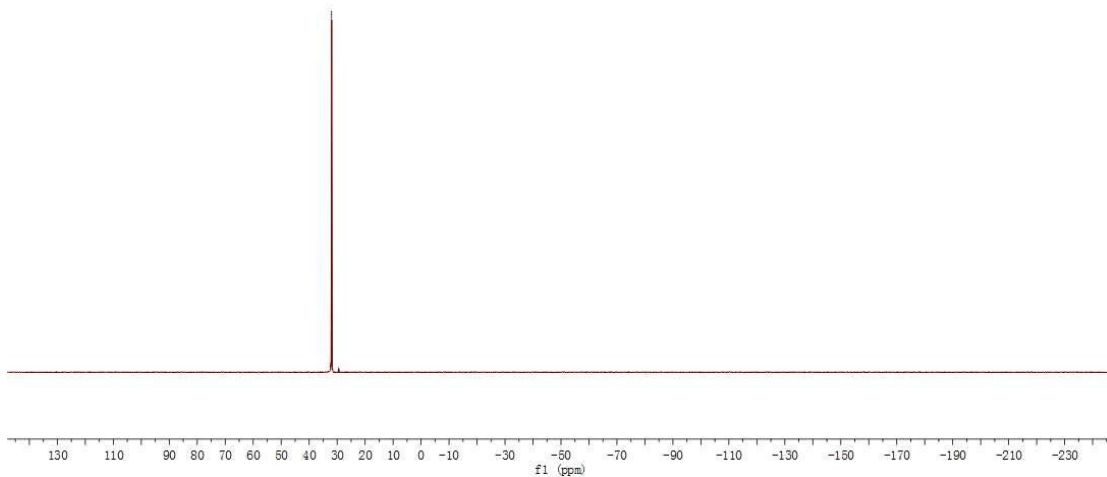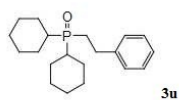

7.318  
7.300  
7.284  
7.234  
7.216  
7.190  
2.972  
2.954  
2.930  
2.914  
1.977  
1.956  
1.926  
1.854  
1.797  
1.746  
1.417  
1.391  
1.318  
1.284  
1.259  
1.240

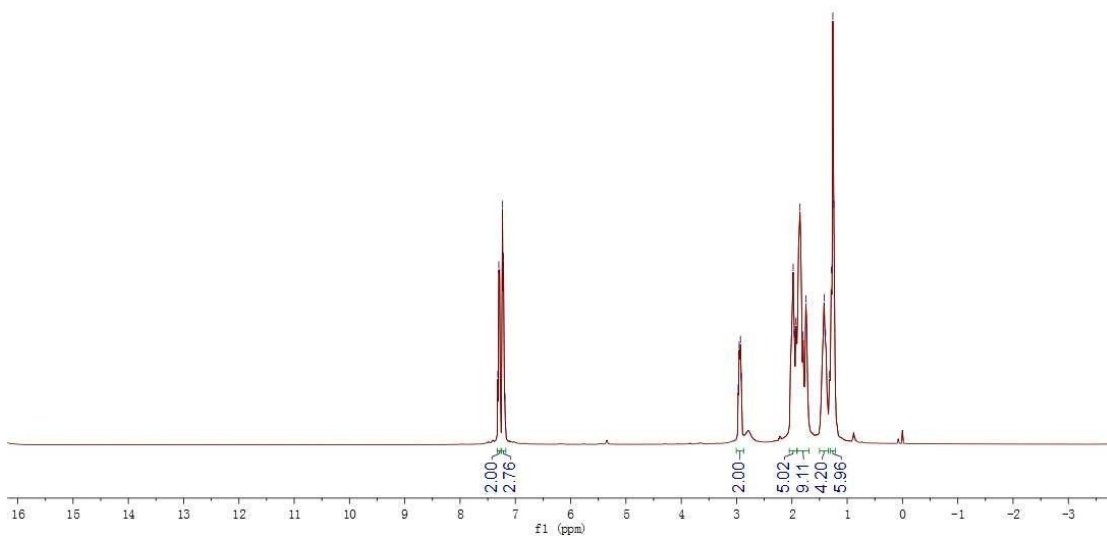



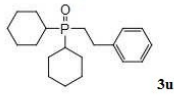

141.878  
141.754  
128.630  
128.011  
126.296

77.444  
77.126  
76.807

36.761  
36.127  
28.115  
28.080  
26.690  
26.659  
26.568  
26.541  
25.973  
25.683  
25.653  
25.312

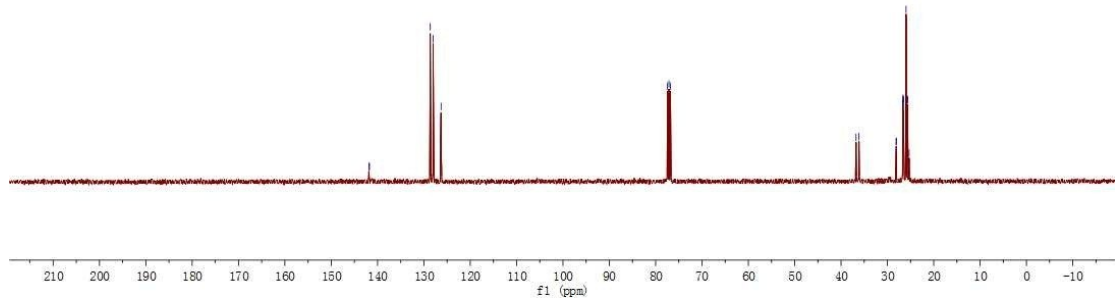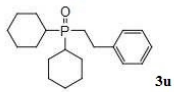

-60.244

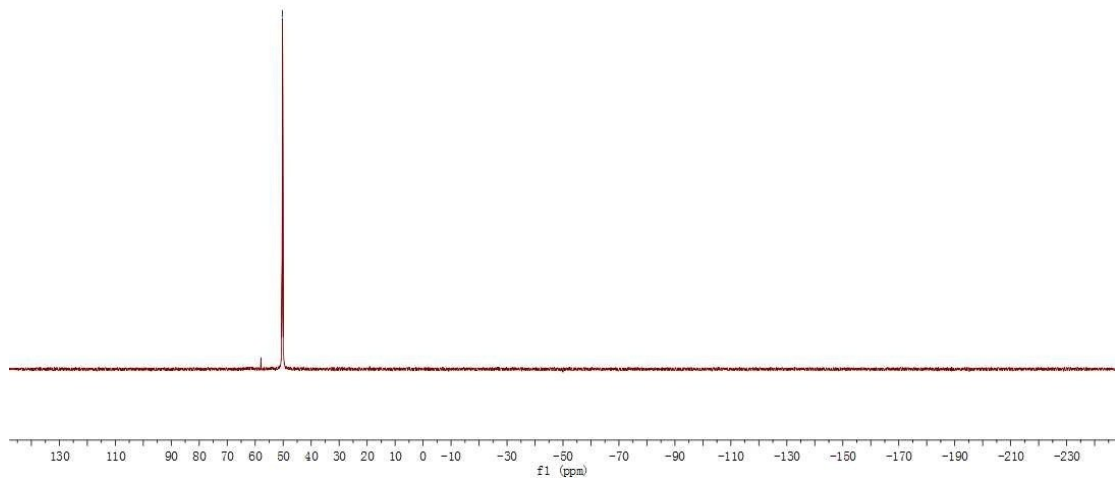

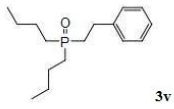

7.324  
7.305  
7.287  
7.275  
7.235  
7.217  
7.200

2.958  
2.937  
2.916  
2.895  
2.054  
2.029  
2.011  
1.985  
1.747  
1.719  
1.706  
1.678  
1.595  
1.578  
1.560  
1.540  
1.520  
1.502  
1.459  
1.441  
1.423  
1.405  
1.387  
1.369  
0.946  
0.928  
0.910

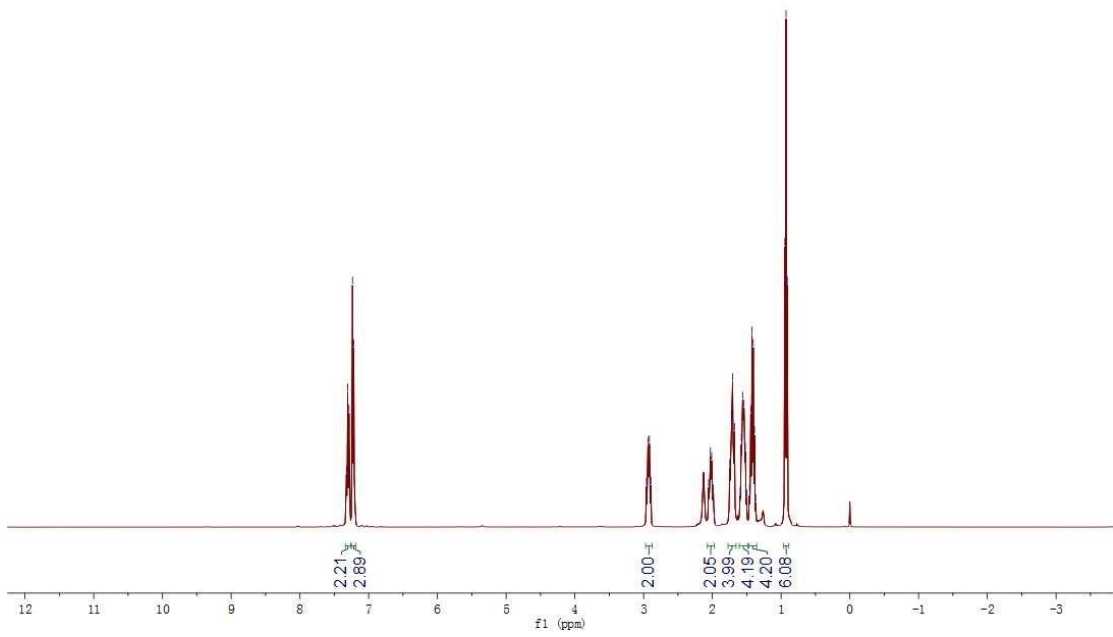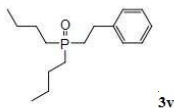

141.232  
141.100  
128.665  
128.060  
126.441

77.379  
77.062  
76.744

30.015  
29.389  
28.098  
27.748  
27.717  
27.454  
24.321  
24.178  
23.823  
23.786  
13.609

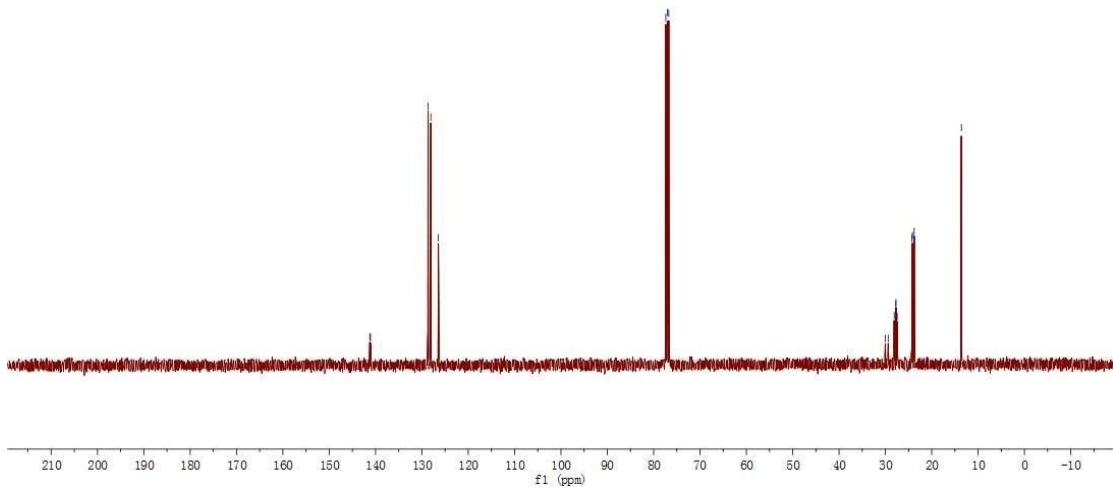

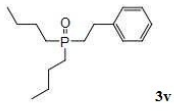

—48.166

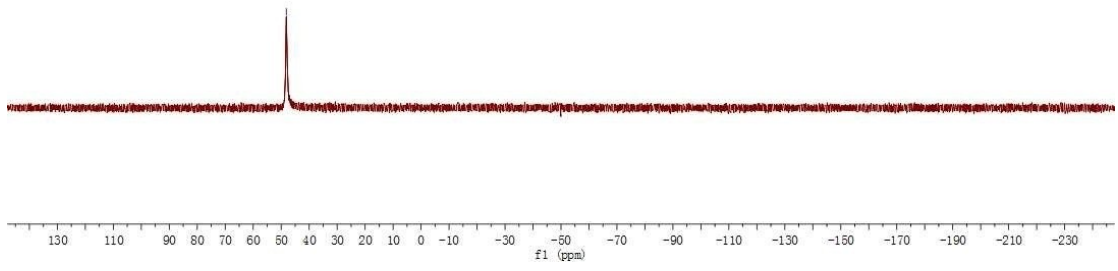

Supplement: c8ob01299g1.pdf [file c8ob01299g1.pdf]
